1 Short Title: PMN: A resource of plant metabolic information

## 2 Plant Metabolic Network: A multi-species resource of plant metabolic 3 information

4 Charles Hawkins<sup>1</sup>, Daniel Ginzburg<sup>1</sup>, Kangmei Zhao<sup>1</sup>, William Dwyer<sup>1</sup>, Bo Xue<sup>1</sup>, Angela Xu<sup>1</sup>, Selena Rice<sup>1</sup>,  
5 Benjamin Cole<sup>2</sup>, Suzanne Paley<sup>3</sup>, Peter Karp<sup>3</sup>, and Seung Yon Rhee<sup>1\*</sup>

6 <sup>1</sup>Carnegie Institution for Science, Plant Biology Department, Stanford, CA 94305

7 <sup>2</sup>DOE-Joint Genome Institute, Lawrence Berkeley Laboratory, Berkeley, CA 94720

8 <sup>3</sup>SRI International, Menlo Park, CA 94025

9 \*To whom correspondence should be addressed ([srhee@carnegiescience.edu](mailto:srhee@carnegiescience.edu))

10 One-sentence Summary: The Plant Metabolic Network is a collection of databases containing  
11 experimentally-supported and predicted information about plant metabolism spanning many species.

### 12 *Author Contributions*

13 S.Y.R. conceived the project. C.H., A.X., and B.X. developed the pipelines and generated PMN databases.  
14 D.G., S.R., and W.D. evaluated the quality of the databases. C.H., S.R., and W.D. compared the databases  
15 using MCA analysis. D.G. performed Omics Dashboard analysis using sorghum drought transcriptome  
16 data. K.Z. analyzed PMN's AraCyc data using *Arabidopsis* root single cell-type transcriptome data. B.C.  
17 curated the *Arabidopsis* root single cell-type transcriptome data. B.X. developed the Co-Expression  
18 Viewer. S.P. and P.K. developed the Pathway Tools software, including the subcellular  
19 compartmentalization viewer. A.X. drew plant artwork for Figure 1. C.H. wrote the manuscript with  
20 contributions from D.G., K.Z., W.D., B.C., and S.Y.R. All authors edited the manuscript. S.Y.R. supervised  
21 the project and manuscript preparation. S.Y.R. agrees to serve as the author responsible for contact and  
22 ensures communication.

### 23 *Abstract*

24 Plant metabolism is a pillar of our ecosystem, food security, and economy. To understand and engineer  
25 plant metabolism, we first need a comprehensive and accurate annotation of all metabolic information  
26 across plant species. As a step towards this goal, we previously created the Plant Metabolic Network  
27 (PMN), an online resource of curated and computationally predicted information about the enzymes,  
28 compounds, reactions, and pathways that make up plant metabolism. Here we report PMN 15, which  
29 contains genome-scale metabolic pathway databases of 126 algal and plant genomes, ranging from  
30 model organisms to crops to medicinal plants, and new tools for analyzing and viewing metabolism  
31 information across species and integrating omics data in a metabolic context. We systematically  
32 evaluated the quality of the databases, which revealed that our semi-automated validation pipeline  
33 dramatically improves the quality. We then compared the metabolic content across the 126 organisms  
34 using multiple correspondence analysis and found that Brassicaceae, Poaceae, and Chlorophyta  
35 appeared as metabolically distinct groups. To demonstrate the utility of this resource, we used recently  
36 published sorghum transcriptomics data to discover previously unreported trends of metabolism  
37 underlying drought tolerance. We also used single-cell transcriptomics data from the *Arabidopsis* root to  
38 infer cell-type specific metabolic pathways. This work shows the continued growth and refinement of  
39 the PMN resource and demonstrates its wide-ranging utility in integrating metabolism with other areas  
40 of plant biology.

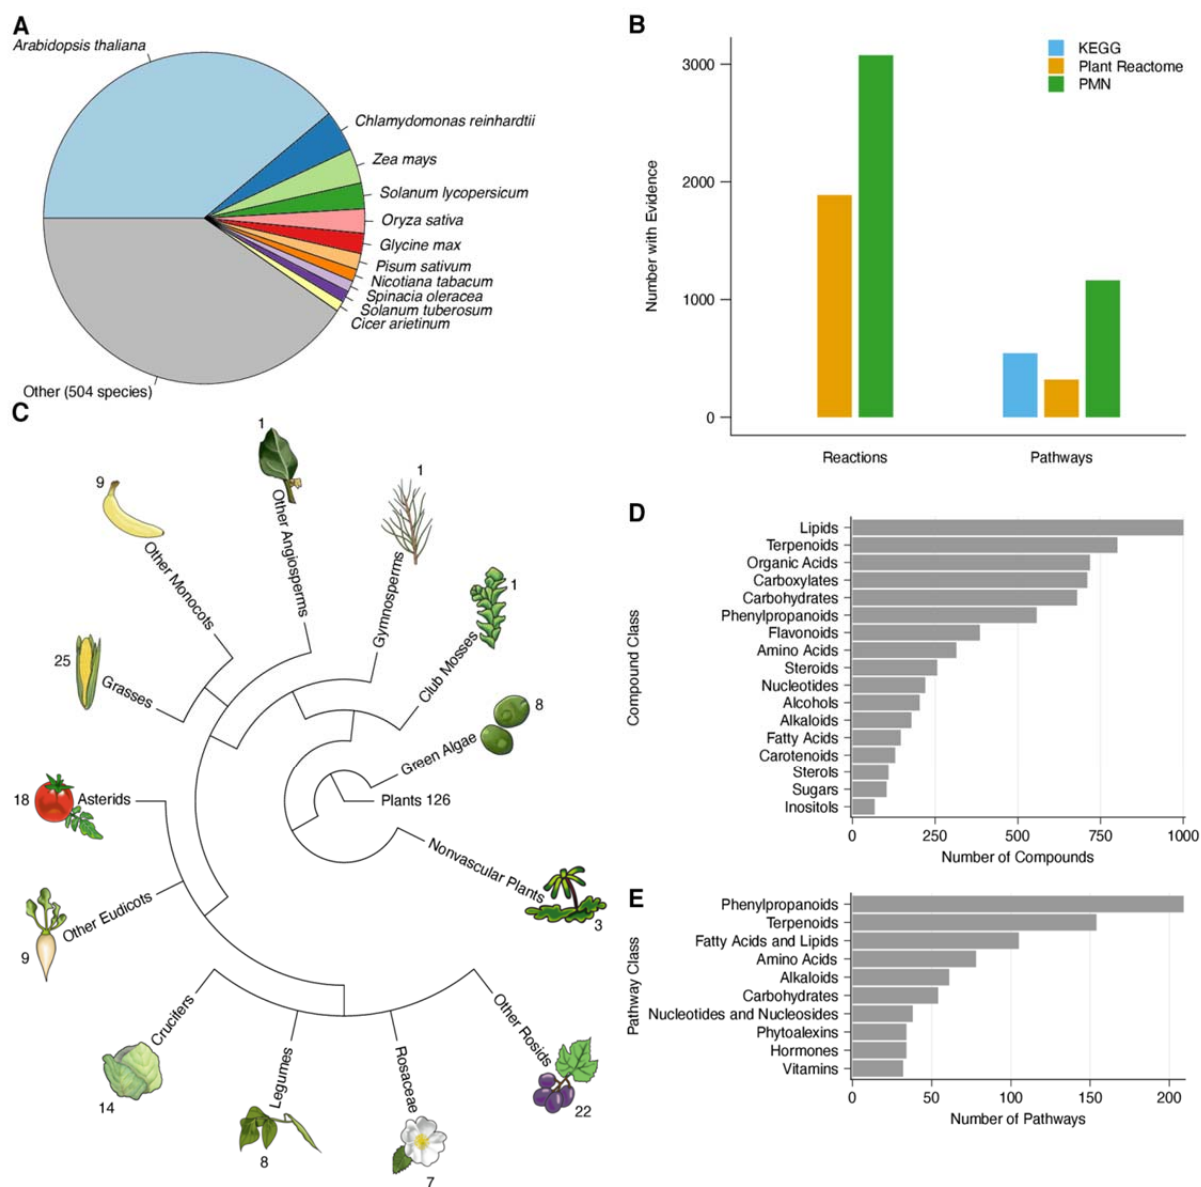

### Figure 1. Plant Metabolic Network (PMN) content

The current content of PMN 15 and comparison to other databases. (A) Distribution of species based on the number of enzymes with experimentally supported evidence in PlantCyc. (B) Comparison of experimentally supported reaction and pathway data in PlantCyc, KEGG, and Plant Reactome databases. Evidence information for KEGG reactions was not accessible as of writing. (C) 126 species in PMN by phylogenetic group. (D – E) Distribution of the 7,316 compounds (D) and 1,280 pathways (E) in PMN 15 (PlantCyc + 126 species-specific databases), by class. The classes were manually selected from PMN's class ontology. The classes are not exclusive; one compound or pathway may belong to multiple classes.

## 41 Introduction

42 Plant compounds are critical for the health, growth, and development of not only the plant, but also our  
 43 planet and its biosphere. They allow the plant to defend itself from biotic and abiotic stressors (Weng

44 2014). The products of plant metabolism are also critical for humans, being the source of most human  
45 nutrition and numerous medicinally-useful compounds (Wurtzel and Kutchan 2016). It is therefore  
46 critical that we can understand, predict, and influence plant metabolism for the furtherance of  
47 economic, public health, and environmental preservation goals.

48 To provide the research community with comprehensive information about plant small-molecule  
49 metabolism, we previously introduced the Plant Metabolic Network (PMN), a plant-specific online  
50 resource of metabolic databases (Schlöpfer et al. 2017). Accessible at <https://plantcyc.org>, the resource  
51 contains known plant metabolites, the reactions that create and consume them, the enzymes that  
52 catalyze the reactions, and the pathways into which the reactions can be organized. PMN consists of  
53 PlantCyc, a database of all experimentally-supported information found in the literature from any plant  
54 species, as well as single-species databases with a mix of experimentally-supported and  
55 computationally-predicted information, which allow researchers to explore each species' unique  
56 metabolism.

57 The single-species databases were created using a computational pipeline we developed (Schlöpfer et al.  
58 2017). This pipeline is organized into three major stages: Enzyme prediction, done with the Ensemble  
59 Enzyme Prediction Pipeline (E2P2) software (Chae et al. 2014; Schlöpfer et al. 2017); pathway, reaction,  
60 and compound prediction, done with the PathoLogic software (Karp et al. 2011; Karp et al. 2016; Karp et  
61 al. 2019); and pathway refinement, done with the Semi-Automated Validation Infrastructure (SAVI)  
62 software (Schlöpfer et al. 2017). E2P2 predicts enzymatic functions of the proteins in a plant's genome  
63 based on a reference protein sequence dataset (RPSD) using BLAST (Altschul et al. 1990) and PRIAM  
64 (Claudel-Renard et al. 2003). PathoLogic, distributed as part of the Pathway Tools software (Karp et al.  
65 2019), takes in the enzyme annotation and retrieves from MetaCyc (Caspi et al., 2019), a pan-species  
66 reference database of metabolism that serves as a reference for PMN, all reactions that E2P2 predicted  
67 to be catalyzed by those enzymes, and predicts pathways based on the reaction complement (Schlöpfer  
68 et al. 2017). Finally, SAVI applies previous pathway-level curation decisions to the new database. For  
69 example, a pathway might have been marked by curators to be present in all plants, in which case the  
70 pathway, along with its reactions and compounds, will be added to any plant database for which it was  
71 not predicted by PathoLogic, though the pathway will not have any enzymes associated to it. This  
72 pipeline enables the creation of a genome-scale metabolic pathway database for any plant species with  
73 a sequenced genome or transcriptome.

74 Here we describe PMN 15, the latest release of PMN that has grown substantially in both content and  
75 tools. We demonstrate the utility of the PMN resource by applying recently published omics data to gain  
76 insights into plant physiology and cellular level metabolism. Additionally, we systematically compare 126  
77 species in the context of metabolism to identify metabolic domains and pathways that distinguish plant  
78 families. Finally, we present new website tools for viewing and analyzing metabolic data including a Co-  
79 Expression Viewer and subcellular boundaries for metabolic pathways.

80

## 81 Results

### 82 PMN is a comprehensive resource of plant metabolism databases

83 PMN is a collection of databases for plant metabolism with a substantial amount of experimentally  
84 supported information. The latest release (version 15) contains 126 databases of organism-specific  
85 genome-scale information of small-molecule metabolism alongside the pan-plant reference database  
86 PlantCyc (Figure 1). Together, these databases include 1,280 pathways, of which 1,163 have direct  
87 experimental evidence of presence in at least one plant species. In addition, PMN 15 includes 1,167,691  
88 proteins encoding metabolic enzymes and transporters where 3,436 have direct experimental evidence  
89 for at least one assigned enzymatic function. There are 9,129 reactions (of which 34% have at least one  
90 enzyme from a plant species that has direct experimental evidence of catalyzing it), and 7,316  
91 compounds. This large volume of metabolic information makes PMN a unique resource for plant  
92 metabolism.

93 The reference database, PlantCyc, is a comprehensive plant metabolic pathway database. PlantCyc  
94 15.0.1 contains experimentally supported metabolic information from 515 species. Most of the data  
95 come from a few model and crop species (Figure 1A). For example, *Arabidopsis thaliana* contributes to  
96 43.4% of experimentally supported enzyme information in PlantCyc, followed by 7.46% from  
97 *Chlamydomonas reinhardtii* and 3.37% from *Zea mays*. Compared to other metabolic pathway  
98 databases such as KEGG (Kanehisa and Goto 2000; Kanehisa et al. 2017) and Plant Reactome (Naithani  
99 et al. 2017; Naithani et al. 2020), PlantCyc has substantially higher numbers of experimentally supported  
100 reaction and pathway data (Figure 1B). PlantCyc 15 includes 3,077 experimentally validated reactions  
101 with at least one curated enzyme and 1,163 curated pathways. Plant Reactome (Naithani et al. 2020)  
102 includes 1,887 and 320 curated reactions and pathways (Gramene release #61), while KEGG includes  
103 543 experimentally-supported pathways as of February, 2021. The reference information in PlantCyc is  
104 incorporated into MetaCyc, which also includes experimentally supported metabolic information from  
105 non-plant organisms and is used to predict species-specific pathway databases (Caspi et al. 2020).

106 In addition to the reference database PlantCyc, PMN 15 contains 126 organism-specific metabolism  
107 databases (Figure 1C, Supplemental Table S1). These databases range widely in the plant lineage  
108 including several green algae and nonvascular plants. The majority of the plants are angiosperms with  
109 the Poaceae family most highly represented with 25 organisms. There are also 8 pairs of wild and  
110 domesticated plants, including rice, wheat, tomato, switchgrass, millet, rose, cabbage, and banana,  
111 alongside their wild relatives (Supplemental Table S2). Finally, PMN 15 includes 6 medicinal plants  
112 (species whose primary use is considered medicinal): *Camptotheca acuminata*, *Cannabis sativa*,  
113 *Catharanthus roseus*, *Ginkgo biloba*, *Salvia miltiorrhiza*, and *Senna tora*. The newest addition to the list  
114 of the medicinal plants is *Senna tora*, which is a rich source for anthraquinones and whose recent  
115 genome sequencing and metabolic complement annotation helped discover the first plant gene  
116 encoding a type III polyketide synthase catalyzing the first committed step in anthraquinone  
117 biosynthesis (Kang et al. 2020). This rich collection of species-specific metabolic pathway databases  
118 enables a wide range of analyses and comparisons.

119 PMN has grown significantly since its initial release (Figure S1A-H), with PMN 15 containing 2.5-fold  
120 more pathways, 4-fold more reactions, 3-fold more compounds, and 153-fold more enzymes than PMN  
121 1. The focus on small-molecule metabolism means that processes involving the polymerization of  
122 macromolecules, such as transcription, translation, and DNA replication are excluded. Data in the PMN  
123 databases are represented using structured ontologies consisting of hierarchical classes to which  
124 pathways and compounds are assigned by PMN curators, which makes statistical enrichment analyses  
125 possible. The pathway and compound ontology classes, alongside the phylogeny of the included species,

126 illustrate the breadth of metabolic information and species included in the database (Figure 1D, E).  
127 Prominent specialized metabolism classes such as terpenoids and phenylpropanoids are highly  
128 represented in the databases.

129 To promote interoperability and cross-referencing with other databases, PMN databases contain links to  
130 several compound databases such as ChEBI (Chemical Entities of Biological Interest) (Hastings et al.  
131 2016), PubChem (Kim et al. 2021), and KNApSACk (Nakamura et al. 2014). ChEBI release 197 has 58,829  
132 entries and serves as a primary source of compound structural information during curation into PMN  
133 databases. Within PMN, 65% (4,746) of compounds link to ChEBI. PubChem is another chemical  
134 database, containing over 270 million chemical entries as of March 2021, and 95% (6,982) of PMN  
135 compounds link to it. Linking to these chemical databases provides a more in-depth source of  
136 information on the compounds and their physical and chemical properties. In summary, PMN is a broad  
137 resource for plant metabolism and continues to be under active development and expansion.

### 138 [Manual validation of pathway predictions reveals the continued necessity of manual curation](#)

139 PMN databases include a large amount of computationally-predicted data. Predicting pathways for  
140 many species allows us to evaluate the quality of the predictions quantitatively. To estimate the extent  
141 of incorrectly-predicted pathways in the PMN databases, and to measure the overall accuracy of the  
142 computational predictions, both alone and in conjunction with manual curation, we evaluated the  
143 prediction of 120 randomly-selected pathways (approximately 10% of the 1280 pathways in PMN) on  
144 both the released organism-specific databases (also called Pathway Genome Databases (PGDBs) in  
145 Pathway Tools) and naïve prediction versions generated using only computational prediction (see  
146 Methods). Biocurators evaluated the pathway assignments to the 126 organisms currently in PMN, and  
147 classified them as “Expected” (predicted phylogenetic range is consistent with information in the  
148 literature), “Broader” (predicted taxonomic range includes expected range but is too broad), “Narrower”  
149 (predicted taxonomic range is within expected range but is too narrow), or as Non-PMN Pathways (NPP,  
150 not known to be present in plants or algae) (Figure 2, Supplemental Tables S3, S4). In the naïve  
151 prediction databases, only 15% of selected pathways were predicted within the phylogenetic ranges  
152 expected from the literature, and 58% were NPPs. In the released PGDBs, however, 78% of evaluated  
153 pathways were predicted as expected. In addition to correcting the prediction for 94% of all NPPs of the  
154 surveyed pathways, incorporating curated information also reduced the percent of pathways predicted  
155 beyond their expected phylogenetic ranges from 13% to 4%. Thus, the application of phylogenetic  
156 information and manual curation drastically improves the quality of pathway prediction throughout  
157 PMN databases over the use of computational prediction alone.

### 158 [PMN data can distinguish phylogenetic groups](#)

159 PMN 15’s utility depends on the completeness and accuracy of the data it contains for its 126  
160 organisms. Objectively evaluating the quality and richness of PMN’s data is not straightforward,  
161 however, because there is no “gold standard” to compare PMN against. If PMN 15 contains data that  
162 accurately reflect the diversity of all 126 organisms, it should be possible to differentiate known groups  
163 of plants based upon their metabolic data. If plants in a specific group cluster together based on their  
164 metabolic content, this may indicate that the unique metabolism of the group is well-represented in  
165 PMN. If a known group cannot be differentiated from others, this may indicate that more research and  
166 curation are needed to understand the group’s unique metabolism and can thereby guide future  
167 research and curation.

168 To determine whether different groups of plants can be differentiated solely by their metabolic capacity,  
169 we performed multiple correspondence analysis (MCA), a type of dimension reduction analysis that is  
170 similar to principal component analysis but can be used for categorical data (Tenenhaus and Young

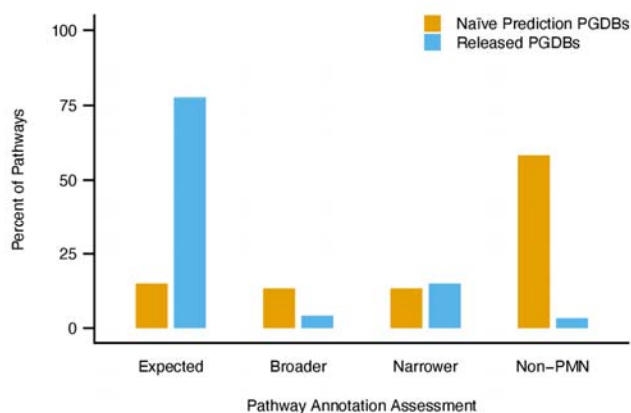

## Figure 2. Manual pathway assessment

The result of manual review of 120 randomly-selected pathways by biocurators. The plot shows the percentage of pathways in each assessment category in the naïve prediction PGDB and the released PGDBs. Expected: Predicted and expected species are consistent; Broader: Pathway is predicted beyond its expected range; Narrower: Predicted range of the pathway is smaller than the expected range; Non-PMN: The pathway is not expected to be found in plants or green algae.

171 1985; Greenacre et al. 2006). MCA was carried out using presence-absence matrices for pathways,  
172 reactions, and compounds (Figure 3 and Supplemental Figure S2; Supplemental Table S5). Reactions  
173 were considered present only if at least one enzyme in the species was annotated as catalyzing the  
174 reaction. Independently, the plants were categorized according to phylogenetic groups. Dimensions 1  
175 and 3 of the pathway and compound MCA, and dimensions 1 and 2 of the reaction MCA, separated the  
176 species into several phylogenetic groups (Figure 3A and Supplemental Figure S2C, G, H). Phylogenetic  
177 groups that clearly cluster together and away from other groups include algae, non-flowering plants,  
178 Brassicaceae, and Poaceae (Figure 3A and Supplemental Figure S2G, H). Dimension 1 separates the  
179 chlorophytes from land plants and dimension 3 separates certain angiosperm families such as the  
180 Brassicaceae and Poaceae well. No clear separation was observed among other eudicot groups. In  
181 addition, dimension 2 of the pathway and compound MCA mostly separated a small number of highly  
182 curated species from all the rest (Figure S2A, E; Supplemental Table S5). Overall, the MCA clustering  
183 shows that some groups of plants can be readily differentiated based on their metabolic information  
184 (compounds, enzymes, reactions, pathways) in PMN, while other groups cannot, suggesting that further  
185 curation of species in these groups may be beneficial.

186 We next asked which metabolic pathways drive the separation of the taxonomic groups on each  
187 dimension (Supplemental Table S5). 70% of the variance in dimension 1 was described by 109 pathways,  
188 all of which were predicted to be either embryophyte-specific pathways or present in a larger  
189 proportion of embryophytes than chlorophytes. This mirrors the separation of the Chlorophyta cluster in  
190 dimension 1 of the MCA plot (Figure 3A; Supplemental Table S5). Similarly, 70% of the variance along  
191 dimension 3 was captured by 150 pathways, of which 81 were associated more strongly with Poaceae  
192 and 69 were associated more strongly with Brassicaceae (Figure 3A; Supplemental Table S5). The  
193 pathways that contributed 95% of the variance in dimension 1, which separates chlorophytes from  
194 embryophytes, were enriched for hormone metabolism (Figure 3B, adjusted p-value = 1.6E-07,  
195 hypergeometric test). Hormone metabolism may have helped support the increased complexity of land

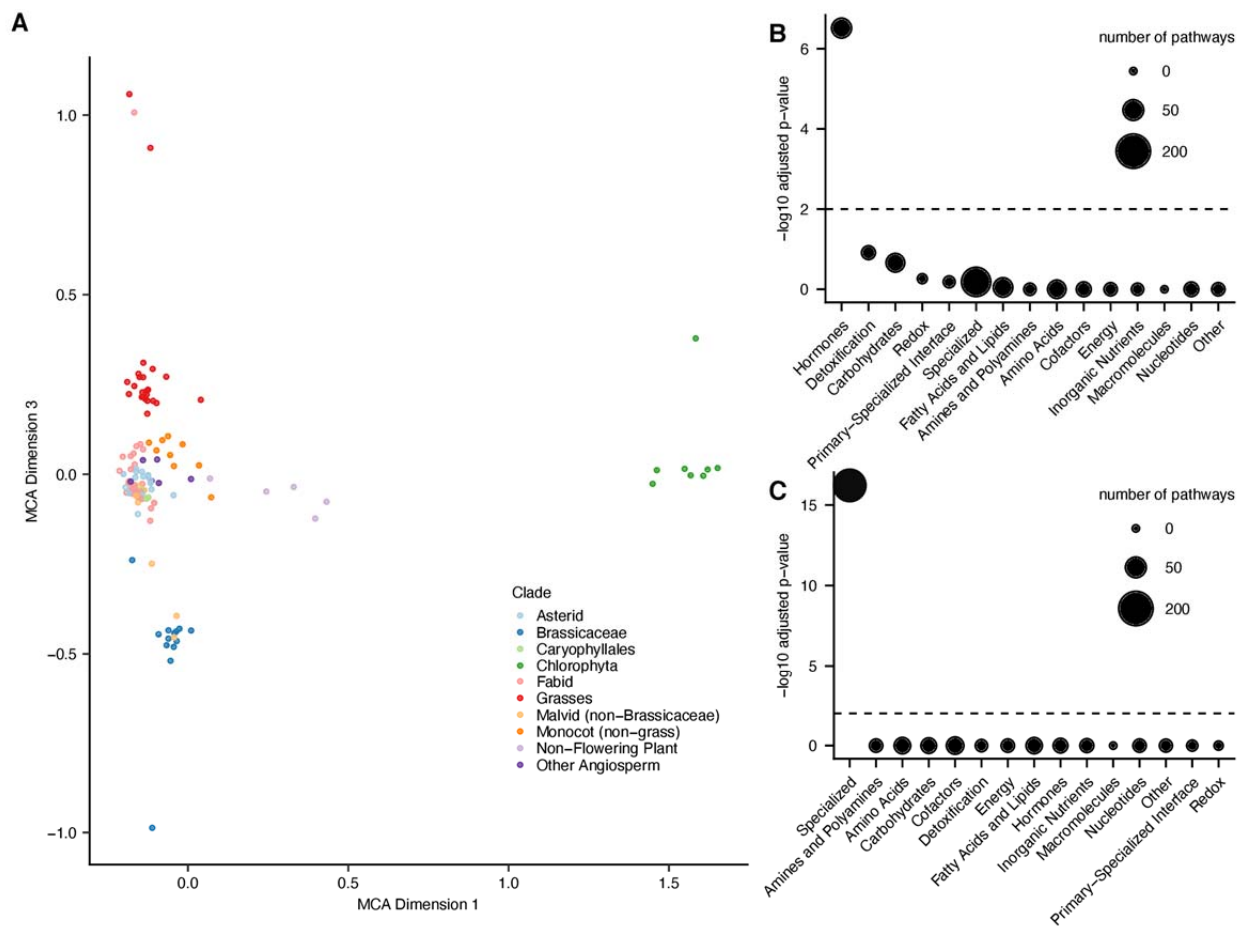

### Figure 3: Pathway multiple correspondence analysis

Multiple correspondence analysis (MCA) performed on a binary matrix of pathway presence/absence in each species. (A) A scatter plot of dimensions 1 and 3 of the MCA; each dot is a plant species, and the coordinates are a dimensional reduction of the binary presence/absence vector of pathways. Color represents plant group information overlaid onto the plot. Brassicaceae, Poaceae, green algae, and non-seed plants are discernable as clusters. Dimensions 1 and 3 were selected because they illustrate the clustering well. (B) Metabolic domain enrichment for pathways explaining 95% of the variance in MCA dimensions 1 and 3; bubble size indicates the number of pathways meeting the 95% variance cutoff in each domain. Dashed lines represent  $p=0.01$  significance threshold. P-values were corrected for multiple hypothesis testing at a false discovery rate (FDR) of 5%.

196 plants compared to their algal ancestors (Wang et al. 2015). In contrast, pathways responsible for  
 197 clustering along dimension 3 were enriched for specialized metabolism (Figure 3C, adjusted p-value =  
 198 1.1E-22, hypergeometric test), which is more lineage-specific than other domains of metabolism and can  
 199 help distinguish between clades of angiosperms (Chae et al. 2014). Thus, it appears that metabolic data  
 200 in PMN can effectively differentiate groups of species not only by the presence or absence of specific  
 201 pathways and reactions, but also by the types of metabolic processes which are related to their  
 202 evolutionary divergence.

203 [Data analysis tools and applications with external datasets](#)

204 PMN contains not only information about the compounds, reactions, and pathways of plant metabolism,  
205 but also a suite of tools to compare and analyze these data. For example, lists of pathways, reactions,  
206 compounds, genes, or other data objects can be assembled into SmartTables for further analyses, or to  
207 export data in a tabular format. Omics data, or any numeric data associated with genes, proteins, or  
208 compounds, can be overlaid onto the pathways and reactions associated with those genes, or uploaded  
209 into Pathway Tools' Omics Dashboard (Paley et al. 2017; Paley et al., 2021), which allows users to  
210 visualize omics data across experimental timepoints and conditions at various scales of metabolism  
211 including broad metabolic domains, individual pathways, and genes. Here we demonstrate two  
212 applications of integrating omics data with PMN resources to gain novel insights about plant  
213 metabolism.

214 To demonstrate the utility of the Omics Dashboard in analyzing omics data within a metabolic context,  
215 we turned to a recently published transcriptomic survey of two sorghum cultivars, RTx430 and BTx642,  
216 subjected to drought stress at multiple points throughout the growing season (Varoquaux et al. 2019).  
217 RTx430 is tolerant to pre-flowering drought, whereas BTx642 is tolerant to post-flowering drought. To  
218 see if there was any difference in metabolic gene expression between the two cultivars in response to  
219 post-flowering drought, we examined differentially expressed genes (DEGs) in droughted plants  
220 compared to well-watered plants from the last week of watering (week 9 after sowing) to the first two  
221 weeks of post-flowering drought (weeks 10 – 11). We observed quantitative differences in global  
222 metabolic gene expression between the two cultivars, specifically the consistent down-regulation of  
223 biosynthetic activity from root tissues in the post-flowering drought sensitive cultivar RTx430 compared  
224 to relatively stable expression in the post-flowering drought tolerant cultivar BTx642 (Figure 4A). This  
225 observation is consistent with the authors' findings that BTx642 demonstrated higher levels of redox  
226 balancing and likely experienced lower levels of reactive oxygen species stress, compared to RTx430, as  
227 a result of drought. By analyzing expression patterns of all metabolic genes, we observed widespread  
228 metabolic down-regulation in RTx430 root tissue, which was not reported previously (Varoquaux et al.  
229 2019). To determine whether the consistent reduction of metabolic gene expression observed in RTx430  
230 roots in response to drought was a global trend in the transcriptome or specific to metabolic genes, we  
231 compared relative expression levels of all non-metabolic root DEGs to all metabolic root DEGs in both  
232 cultivars during the same 3-week period. While the average relative expression decreased each week  
233 among both metabolic and non-metabolic genes in RTx430, the down-regulation was greater among  
234 metabolic genes at both time points (Supplemental Figure S3B). In contrast, BTx642 roots showed no  
235 difference in expression among both metabolic and non-metabolic genes in response to drought  
236 (Supplemental Figure S3B), suggesting a global metabolic homeostasis in sorghum drought tolerance. By  
237 comparing the *patterns* of expression among DEGs in root and leaf tissues, rather than solely the  
238 *number* of DEGs, analysis via the Omics Dashboards revealed that roots exhibited stronger genotype-  
239 specific responses to drought than leaves, which was not observed previously (Varoquaux et al. 2019).  
240 Drought-responsive DEGs were enriched in metabolic genes among both leaf ( $p = 2.2E-84$ ,  
241 hypergeometric test) and root ( $p = 1.7E-114$ , hypergeometric test) tissues. However, contrary to the  
242 clear cultivar-specific trends shown in the root DEGs (Figure 4A), the metabolic genes did not show any  
243 clear trend in their expression patterns in the leaves of either cultivar as a result of drought (Figure S3A).

244 In addition to offering a visual overview of metabolism via the Omics Dashboard, PMN's analytical  
245 toolkit allows researchers to easily conduct enrichment analyses among a set of genes or compounds of  
246 interest. From within a SmartTable, users can view the pathways associated with a set of genes or  
247 compounds, and can then ask whether those genes or compounds are enriched for specific pathways or  
248 classes of pathways. Broader metabolic classifications can also be added to the list of enriched pathways  
249 to better understand which area(s) of metabolism are most enriched. For example, among the set of  
250 drought-responsive DEGs in RTx430 roots, we observed an enrichment in various domains of



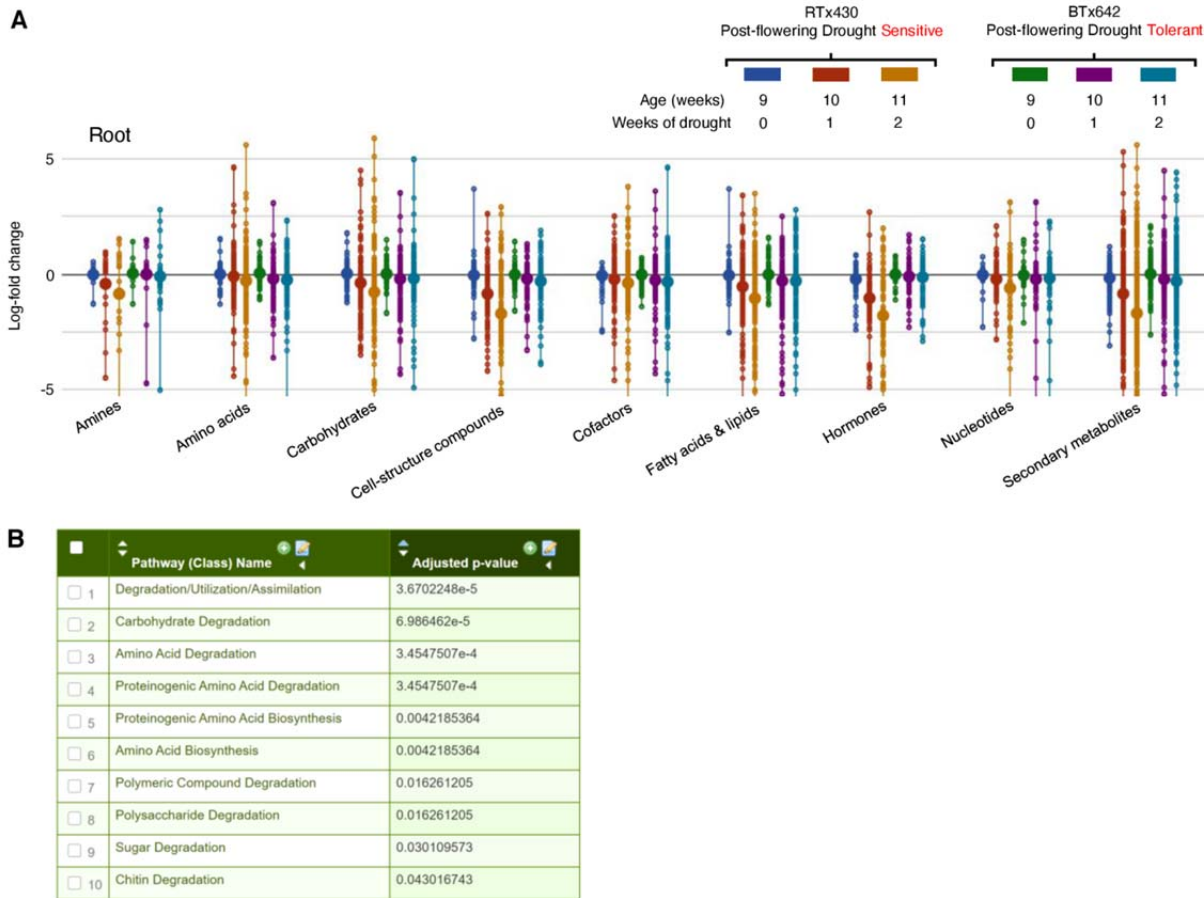

**Figure 4: PMN's Omics Dashboard and pathway enrichment analyses**

(A) Omics Dashboard representation of global metabolic biosynthetic expression patterns among DEGs in response to drought in root tissues of two sorghum cultivars. The y-axis represents  $\log_2$  fold-change expression between drought and non-drought conditions at each time point; positive values indicate higher expression under drought. Categories along the x-axis are major top-level pathway classes in Pathway Tools. (B) Screenshot of the results of a pathway enrichment performed in PMN, showing significantly enriched pathways among drought-responsive metabolic genes compared to all metabolic genes in RTx430 root tissue.

251 carbohydrate and amino acid biosynthesis and degradation, in addition to chitin degradation, consistent  
 252 with the authors' observation of drought-induced responsiveness of biotic defense genes (Figure 4B).  
 253 Thus, by combining PMN's analytical capabilities with its broad set of metabolic data, users can find  
 254 additional means of supporting existing hypotheses, uncovering novel insights, and finding new avenues  
 255 for exploration in their own research.

256 The data-rich resources within PMN can also be integrated with other cutting-edge datasets to  
 257 investigate novel biological questions. For example, single cell sequencing technologies, such as drop-  
 258 seq and the 10X scRNA-Seq platform, have been adapted to plant cells to generate high-resolution  
 259 transcriptomic profiles in *Arabidopsis* root cells (Denyer et al., 2019; Jean-Baptiste et al. 2019; Ryu et al.,  
 260 2019; Shulse et al. 2019; Zhang et al., 2019; Wendrich et al., 2020). In this study, we downloaded and

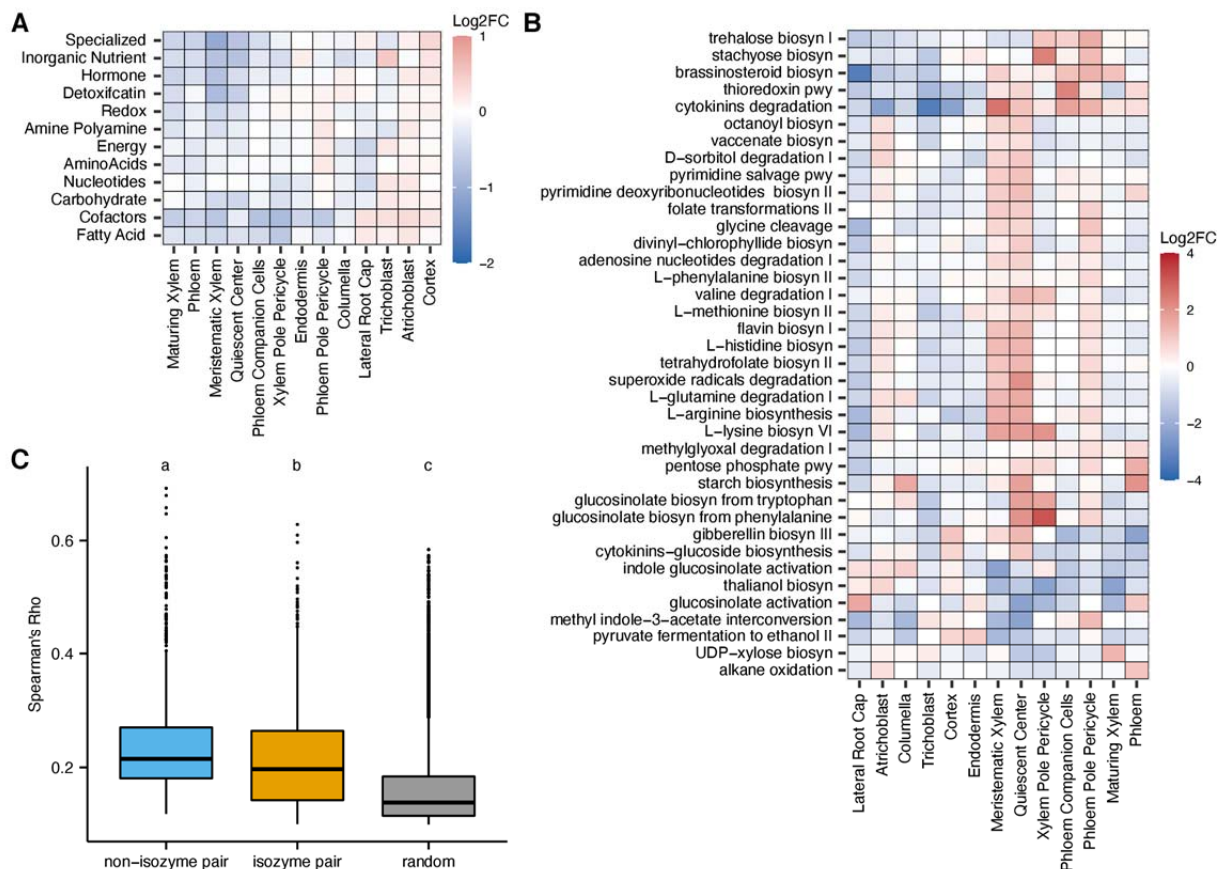

**Figure 5: Comparison of metabolism across *Arabidopsis* root cell types**

Cell type specificity of metabolic (A) domains and (B) pathways. Log<sub>2</sub>FC represents the log<sub>2</sub> fold change of the expression level of a metabolic domain or pathway in a cell type over their average expression level in total cells. (C) Isozymes are more likely to be expressed in different cell types compared to other enzymes catalyzing different reactions in the same pathway. The box plot represents Spearman's correlation coefficient computed to measure the gene expression pattern similarity between a pair of enzymes across *Arabidopsis* root cells. Letters above the boxes represent significantly different groups of p value < 0.05 as determined by one-way ANOVA followed by post-hoc Tukey's test.

261 integrated datasets from five existing *Arabidopsis* root single-cell RNAseq studies to generate a  
 262 comprehensive transcriptome profile (Supplemental Table S6). These single-cell level data allow us to  
 263 investigate cell type specificity of metabolic pathways and domains at the transcript level. We define cell  
 264 type-specific metabolic domains (or pathways) as those whose constituent genes show significantly  
 265 higher expression levels (fold change  $\geq 1.5$ , Wilcoxon test p-value 0.05) in certain cell types compared to  
 266 their average expression level in total cells. Different metabolic domains showed overlapping as well as  
 267 distinct cell type specificity (Figure 5A). First, epidermal and cortex cells were most metabolically active  
 268 throughout the various domains of metabolism (Figure 5A). This is consistent with previous observations  
 269 that the major groups of metabolites detected in *Arabidopsis* roots, including glucosinolates,  
 270 phenylpropanoids, and dipeptides, were highly abundance in the cortex (Moussaieff et al. 2013). In  
 271 contrast, maturing xylem showed relatively low metabolic activity as the major roles of these cells are

272 structural support and water/soluble transport (Schuetz et al. 2013). Viewed from the level of metabolic  
273 domains, this analysis demonstrates a diverse range of metabolic activity across unique cell types in  
274 *Arabidopsis* roots.

275 We next probed cell-type specificity of individual pathways. Among the 198 pathways associated with at  
276 least 10 genes, 40 pathways (20%) showed specificity in at least one cell type compared to their  
277 background gene expression levels represented by the average expression level of the pathway across  
278 all cell types (Figure 5B). For example, in actively dividing cells, such as meristematic xylem cells,  
279 pathways involved in pyrimidine, histidine, arginine, and lysine biosynthesis showed high activity (Figure  
280 5B). These pathways are involved in essential metabolism, which are critical for maintaining cell division  
281 and growth. On the other hand, hormone biosynthesis pathways, such as cytokinin glucoside and  
282 gibberellin, showed high activity in the cortex. This is consistent with current understanding that the  
283 cortex is one of the predominant cell types that synthesizes these two hormones in the *Arabidopsis* root  
284 (Antoniadi et al. 2015; Barker et al. 2020). By elucidating cell type-level activity of metabolic pathways,  
285 we can begin to map metabolism at cellular and tissue levels, which will be instrumental in  
286 understanding how metabolism affects plant development and responses to the environment as well as  
287 enabling effective engineering strategies.

288 Similar to cell-type specificity, the concept of pathway divergence at the individual cell level can also be  
289 explored using single cell transcriptomics data. To probe this question, we asked whether isozymes  
290 catalyzing the same reaction are more likely to be expressed in different cells compared to enzymes  
291 catalyzing different reactions in the same pathway. Isozymes are defined as enzymes encoded by  
292 different genes catalyzing the same reaction, which are usually the result of gene duplication events. We  
293 computed Spearman's correlation coefficient to measure gene expression pattern similarity between a  
294 pair of enzymes across *Arabidopsis* root cells. The coefficients computed based on single cell data were  
295 generally lower than that generated by bulk RNA-seq, which may be due to the sparseness of single cell  
296 transcriptomic profiles or high heterogeneity of gene expression across cells. Nonetheless, metabolic  
297 genes in the same pathway showed higher correlation than randomly sampled metabolic genes (Figure  
298 5C), which suggests functional coordination between genes involved in the same pathway at the cellular  
299 level. Isozymes were much less correlated than enzyme pairs catalyzing different reactions in the same  
300 pathway. This indicates that isozymes may have evolved divergent expression patterns in root cells  
301 (Figure 5C). Since isozymes are often the results of gene duplication events, this diversified expression  
302 between isozymes may contribute to retaining duplicated genes through subfunctionalization or  
303 neofunctionalization and fine-tuning metabolic pathways at the cellular level (Panchy et al. 2016).

#### 304 [New capabilities and integration with other databases](#)

305 Recently we introduced the Pathway Co-Expression Viewer, which integrates information from PMN and  
306 ATTED-II (Obayashi et al. 2018), a database of gene co-expression, to visualize co-expression of the  
307 genes in a pathway for species represented in ATTED-II (*Arabidopsis thaliana*, *Glycine max* (soybean),  
308 *Solanum lycopersicum* (tomato), *Oryza sativa* (rice), *Zea mays* (maize), *Brassica rapa*, *Vitis vinifera*  
309 (grape), *Populus trichocarpa* (poplar), and *Medicago truncatula*). An example is shown in Figure 6A-B;  
310 Lysine biosynthesis is currently known to occur via two distinct routes, utilizing either diaminopimelate  
311 or  $\alpha$ -aminoadipate as an intermediate. Its biosynthetic pathway in plants, cyanobacteria, and certain  
312 archaeobacteria (PWY-5097) (Figure 6A) converts tetrahydrodipicolinate to L,L-diaminopimelate via L,L-  
313 diaminopimelate aminotransferase and is distinct from that of other prokaryotes and of fungi (Hudson  
314 et al. 2006). Lysine biosynthesis is of particular importance as it is both an essential amino acid not  
315 biosynthesized by mammals and it is the least abundant essential amino acid in cereals and legumes  
316 (Wang and Galili, 2016). The Pathway Co-Expression Viewer shows that the genes in this pathway exhibit  
317 high levels of co-expression. The co-expression levels of six pairs of genes are in the top 1% of co-

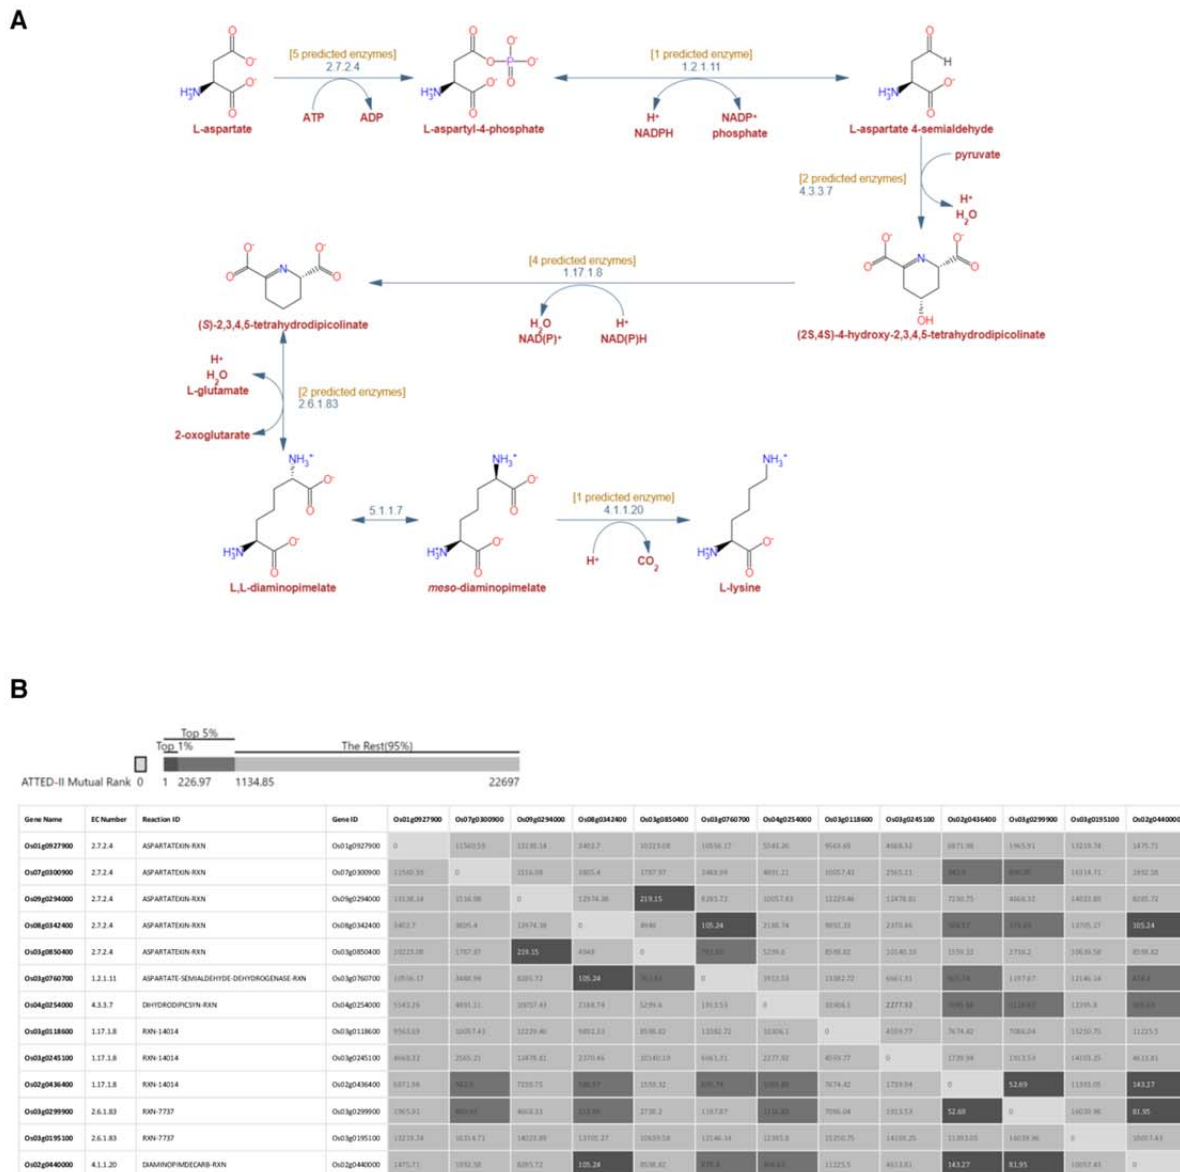

## Figure 6: Pathway visualization tools

Exploration of the pathway visualization tools in PMN. (A) L-lysine biosynthesis VI (PWY-5097) in *OryzaCyc* 7.2.0. (B) co-expression view of the rice genes that code for enzymes which catalyze reactions in the lysine pathway. Genes are in both rows and columns. Each numerical cell shows the co-expression of the two genes as ATTED-II mutual rank (Obayashi et al. 2018). Lower numbers indicate stronger co-expression. Medium gray indicates the pairing is in the top 5% of the mutual rank score; dark gray indicates top 1%. Genes with no co-expression data have been manually removed from the table.

318 expressed gene pairs within ATTED-II, while an additional 10 gene pairs are in the top 5% (Figure 6B,  
 319 dark gray). This tool provides a convenient way of visualizing the co-expression of genes in a pathway  
 320 and thus provides clues as to how the pathway may be regulated.

321 PMN 15 introduces an additional feature which provides a new way of visualizing pathways that span  
322 intracellular compartments and include transport reactions. For example, the glutamate-glutamine  
323 shuttle (PWY-7061; Figure 7) from AraCyc is a pathway in which glutamate and glutamine are exchanged  
324 between the mitochondria and chloroplast as a means of ridding the mitochondria of ammonium  
325 produced during photorespiration (Linka and Weber 2005). Membranes that separate compartments  
326 are rendered as gray bars, with both sides labelled, and transporters are shown as breaks in the gray bar  
327 with pairs of brown ovals on either side to suggest a channel. This new feature makes intracellular  
328 transport within pathways clearer and easier to visualize.

329

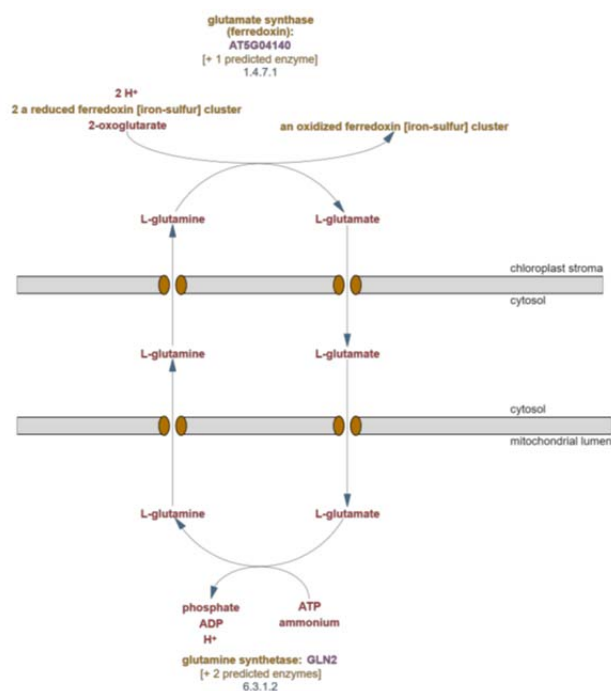

**Figure 7: Visualization of pathway subcellular localization**

Subcellular localization view introduced in PMN 15. The glutamate-glutamine shuttle (PWY-7061) in AraCyc 17.1.1 is shown, with chloroplast and mitochondrial outer membranes displayed on the diagram.

## 330 Discussion

331 PMN 15 is an extensive and regularly-updated database of compounds, pathways, reactions, and  
 332 enzymes for 126 plant and green algae species and subspecies as well as a pan-species reference  
 333 database called PlantCyc. We examined the quality of the data contained in the databases by assessing  
 334 the accuracy of pathway prediction via manual validation of a randomly-selected subset of predicted  
 335 pathways. Using two publicly available transcriptomics datasets, we demonstrated how PMN resources  
 336 can be leveraged to characterize and gain insights from omics data. The present work demonstrates that  
 337 the Plant Metabolic Network can be a useful tool for various analyses of plant metabolism across  
 338 species.

## 339 Accuracy of PMN

340 The ability of PMN to enable research is dependent on the accuracy of its data. We therefore evaluated  
 341 the performance of PMN's metabolic reconstruction pipeline both in its entirety and using only  
 342 computational prediction. The manual pathway validation revealed a number of pathways predicted to  
 343 be present outside of their known taxonomic range, such as momilactone's predicted presence across  
 344 Poaceae despite being known to exist only in rice and a few other species, some outside of Poaceae (in  
 345 which they appear to have evolved convergently) (Mao et al. 2020). While some of these results may  
 346 reflect compounds that are, in fact, more widely distributed than currently thought, many such cases  
 347 likely result from inaccurate prediction of enzymatic function by E2P2. The performance of enzyme  
 348 function prediction using a sequence similarity approach can suffer when dealing with highly similar  
 349 enzymes of a shared family (Schlöpfer et al. 2017). In cases like momilactone, where the pipeline has

350 predicted the pathway in species closely related to species known to possess it, it may be the case that  
351 the predicted species do have most of the enzymes necessary to catalyze the pathway, but that one or a  
352 few of the predicted enzymes actually have a different function *in vivo*. This may draw attention to cases  
353 where enzymes have gained new functions and allow for exploration of how enzymes evolve.  
354 Meanwhile, cases of universal plant pathways being predicted only in Brassicaceae may indicate the  
355 pitfalls of an overemphasis on *Arabidopsis* in curation and research, as key enzymes might be predicted  
356 less reliably outside of this clade. This might be the case if there are Brassicaceae-specific variations that  
357 may result in a failure to reliably predict orthologs. A focus on curating information from diverse species  
358 may improve the accuracy of the computational prediction, requiring less semi-automated curation to  
359 fix such errors.

360 Pathway misannotation in the naïve prediction pipeline (see Methods) could also be the result of  
361 PathoLogic's incorrect integration of enzyme annotation with reference reactions. In addition to  
362 incorporating enzyme predictions, PathoLogic can infer pathways for a given species based on a number  
363 of additional considerations. For example, if a species contains an enzyme which catalyzes a reaction  
364 unique only to one pathway in the PGDB, the pathway is likely to be predicted to be present.  
365 Additionally, if all reactions of a pathway are predicted to be present, the pathway is likely to be  
366 predicted as. Using PathoLogic without taxonomic pruning thus provides increased prediction sensitivity  
367 while also increasing false positives (Karp et al. 2011; Schläpfer et al. 2017). By design, SAVI removes  
368 false-positive and adds false-negative pathways predicted by PathoLogic. Our analyses indicate that the  
369 predominant function of SAVI and PathoLogic's taxonomic pruning currently is to remove false-positives  
370 and consequently restrict the taxonomic range of predicted pathways, consistent with previous analyses  
371 of SAVI's performance (Figures 2, S2) (Schläpfer et al. 2017). Interestingly, our manual pathway  
372 assessment revealed that, in certain cases, SAVI should have increased the range of a predicted pathway  
373 and added it to more species than it was predicted for by PathoLogic. For example, the phytol salvage  
374 pathway (PWY-5107) is predicted to be present in all photosynthetic organisms (Valentin et al., 2006).  
375 While PathoLogic incorrectly restricted the predicted range of this pathway to include only angiosperms  
376 even without taxonomic pruning, SAVI did not correct this incorrect taxonomic restriction, nor did it  
377 assign the pathway to the few angiosperm species not predicted by PathoLogic to contain the pathway.  
378 Examples like this may represent errors in the manual curation decisions used by SAVI to make its  
379 correction, or it may reflect new information added to the literature after those curation decisions were  
380 made. Both possibilities represent important information in accurately representing metabolism across  
381 species and highlight the need to regularly update the curation rules upon which SAVI operates. We  
382 therefore reclassified the final pathway assignments in PMN 15 for each pathway whose classification  
383 after SAVI implementation was determined to be anything other than "Expected". Through the  
384 continual process of introducing new species — and thus new pathways — into PMN, along with regular  
385 curation of those new pathway predictions, SAVI's correction performance, and thus the overall value of  
386 data in PMN, should continue to improve over time.

### 387 Other metabolic pathway databases

388 PMN strives to differentiate itself from other metabolic pathway databases through the quantity of  
389 curated and computational information, its comprehensive set of tools, and its specific focus on plants.  
390 Other, comparable databases include KEGG (the Kyoto Encyclopedia of Genes and Genomes) (Kanehisa  
391 and Goto 2000; Kanehisa et al. 2017; Kanehisa et al. 2019), Plant Reactome (Gramene Pathways)  
392 (Naithani et al. 2020), and WikiPathways (Slenter et al. 2018). Like PMN, these databases contain  
393 metabolic pathways along with their associated reactions, compounds, and enzymes. KEGG pathways  
394 represent broad metabolic reactions shared among many organisms, and it is common to map genes or  
395 compounds to KEGG pathways alongside Gene Ontology (GO) annotations for enrichment analyses.

396 However, because KEGG pathways represent a generalized set of reactions leading to many possible  
397 compound classes (but not to specific compounds), it lacks the granularity to analyze metabolism on a  
398 species-specific level (Altman et al. 2013). For example, a recent study identified enriched KEGG  
399 pathways (e.g., “phenylpropanoid biosynthesis”) among genes belonging to gene families that were  
400 expanded in *Senna tora* compared with its relatives (Kang et al. 2020). Enrichment analysis of the same  
401 genes using PMN’s StoraCyc 1.0.0 identified individual phenylpropanoid biosynthetic pathways enriched  
402 among the gene set, such as coumarin biosynthesis. PMN and MetaCyc feature structured data that is  
403 both human- and machine-readable, making it possible for users to obtain pathway structure and other  
404 data for their own offline analysis and enabling features such as the pathway Co-Expression Viewer to  
405 be easily incorporated. WikiPathways is another pathway-centric database. WikiPathways is not plant-  
406 focused, and takes a crowd-sourced approach, in contrast with PMN’s focus on expert curation. Plant  
407 Reactome, another metabolism database, is specific to plants and green algae as PMN is. However, Plant  
408 Reactome uses *Oryza sativa* as a reference species to predict reactions and pathways to the 106 other  
409 species currently in the database and uses gene orthology to predict the presence of a pathway, where a  
410 pathway is predicted in a species if at least one rice ortholog for an enzyme in that pathway is present in  
411 that species (Naithani et al. 2020). Pathway prediction in PMN, on the other hand, is more stringent via  
412 its implementation through the PathoLogic and SAVI pipelines.

#### 413 [Associations between metabolism and phylogeny](#)

414 PMN is organized primarily by species, and a significant component of the expansion over its history has  
415 been in the form of adding new species and subspecies to it. In order for this to be a worthwhile  
416 endeavor and useful to the plant biology research community, the species databases need to be  
417 meaningfully differentiated from one another in ways that accurately reflect their metabolic differences.  
418 Multiple correspondence analysis was therefore performed to determine whether related species would  
419 cluster together, an indication that underlying biology is driving the differences in their database  
420 contents. The analysis revealed that some plant groups such as Brassicaceae, Poaceae, the green algae,  
421 and non-flowering plants each clustered together, showing that these major groups of plants can be  
422 readily differentiated based on their metabolic complements. Within the eudicots, however, there was  
423 little separation apart from the grouping of Brassicaceae. Other groups such as Rosaceae and  
424 Solanaceae did not separate from the other eudicots, even though both groups are known to have  
425 unique metabolism, suggesting that more research and curation on members of these groups is needed.  
426 This analysis also indicated that despite being represented by a number of PMN species, the unique  
427 metabolisms of these groups remain understudied. The separation of Brassicaceae from the other  
428 groups may reflect a more comprehensive body of knowledge about the metabolism of *Arabidopsis* due  
429 to its status as a model plant and, as a result, a larger number of Brassicaceae-specific pathways being  
430 known than for compounds specific to other clades. The same might be true of the grasses, a clade that  
431 contains economically important crops such as maize, rice, wheat, and switchgrass. These results  
432 suggest that study of representative members of a group could help differentiate the group as a whole  
433 and suggest that much of current knowledge is limited to common pathways. More detailed studies of  
434 the metabolism of other groups are needed to understand what makes them unique.

#### 435 [Previous work making use of PMN](#)

436 PMN has been used in a variety of ways by the plant research community. One common use is to find  
437 metabolic information about a specific area of metabolism, such as finding sets of biosynthesis genes for  
438 a particular compound or sets of compounds under study, or finding pathways associated with a set of  
439 genes highlighted by an experiment. Clark and Verwoerd (2011) used AraCyc to determine different  
440 biosynthetic routes for anthocyanin pigments and predict minimal sets of genes which could be mutated  
441 to eliminate pigment production. Pant et al. (2015) performed metabolite profiling on phosphorus-



442 deprived *Arabidopsis* wild type plants and phosphorus-signaling mutants. PMN was used to find genes in  
443 the biosynthetic pathways of metabolites which showed altered concentration in the mutants and P-  
444 deprived plants. Saptari and Susila (2018) examined the expression of hormone biosynthesis genes  
445 during somatic embryogenesis in *Arabidopsis* and rice. The authors used PMN to identify hormone  
446 biosynthetic genes and performed expression analysis on the identified gene set. Kooke et al. (2019)  
447 used AraCyc (alongside other databases) to identify genes involved in glucosinolate and flavonoid  
448 metabolism, and then examined the relationship between methylation of these genes and metabolic  
449 trait values. Uhrig et al. (2020) examined diurnal changes in protein phosphorylation and acetylation,  
450 and used PMN's pathway enrichment feature to identify AraCyc pathways enriched for proteins  
451 associated with these protein modification events.

452 A second common use of PMN is to study broader patterns in plant metabolism. Hanada et al. (2011)  
453 explored two rival hypotheses which attempt to explain the large number of *Arabidopsis* metabolic  
454 genes for which single mutants show weak or no phenotypes, and used data from PMN to determine  
455 the connectivity of different metabolites in the network. Chae et al. (2014) compared primary and  
456 specialized metabolism in plants and green algae and found that specialized metabolism genes have  
457 different evolutionary patterns from primary metabolism genes. Moore et al. (2019) used AraCyc in  
458 assembling lists of enzyme-coding genes involved in primary and specialized metabolism, and then  
459 explored associations between various qualities and metrics of the genes and their involvement in  
460 primary or specialized metabolism. The PlantClusterFinder (Schlöpfer et al. 2017) software was also used  
461 in that analysis. Song et al. (2020) set out to test the hypothesis that stoichiometric balance imposes  
462 selection on gene copy number. AraCyc pathways were used as a source of functionally-related gene  
463 groups to test for reciprocal retention.

464 A third use of PMN is in genome annotation. Gupta et al. (2015) used RNA-seq data from blueberry  
465 (*Vaccinium corymbosum*) to annotate a draft genome sequence for the plant. Gene models were  
466 BLASTed against metabolic genes from AraCyc and other species-specific pathway genome databases,  
467 and the results were used to improve the annotations. The annotations were then used to examine  
468 blueberry metabolism. Similarly, Najafabadi et al. (2017) took transcriptomes of *Ferula gummosa* Boiss.,  
469 a relative of carrot that is the source of the aromatic resin galbanum, and used BLASTx against enzyme-  
470 coding genes from PMN as a source for annotation of enzyme-coding genes in *Ferula*.

## 471 Conclusions

472 PMN provides an important resource for organizing and making accessible plant metabolism  
473 information. The study of plant metabolism enables improvement of the productivity, nutrition, and  
474 resilience of crop plants, and furthers understanding of how wild plants function in their ecosystems.  
475 PMN data and tools have been used by researchers to answer a broad range of biological questions from  
476 development to physiology to evolution. The latest release of PMN, PMN 15, has the breadth and depth  
477 of metabolic information that should enable even a wider spectrum of questions to be pursued in plant  
478 biology.

479

## 480 Methods

### 481 The PMN pipeline

482 New plant databases introduced in each version of PMN are Tier 3 BioCyc databases (Karp et al. 2019),  
483 which indicate that the information is based mostly on automated prediction using their genome. Any  
484 experimentally-supported enzymes and pathways in Metacyc or PlantCyc that are annotated as  
485 belonging to the organism are also imported into the database along with their citations and codes for  
486 the type of evidence the cited papers present. The plant's remaining complement of enzymes is  
487 predicted, and its metabolites and pathways are in turn predicted based on the enzymes.

488 Bringing a new species or subspecies into PMN begins with the sequenced and annotated genome with  
489 predicted protein sequences. To be considered for inclusion, a genome must pass a quality metric in the  
490 form of BUSCO (Benchmarking Single-Copy Orthologs) (Simão et al. 2015; Waterhouse et al. 2018),  
491 which assesses genome completeness using a database of proteins expected to be present in all  
492 eukaryotes, with matches assessed using HMMER (<http://hmmer.org>) (Potter et al. 2018). A score of at  
493 least 75% "complete" is required for inclusion in PMN. If a genome passes this metric, it can then be run  
494 through the PGDB creation pipeline. First, splice variants are removed, leaving one protein sequence per  
495 gene, with the longest variant being retained. The sequences are classified as enzymes or non-enzymes,  
496 and enzymatic functions are predicted, using the Ensemble Enzyme Prediction Pipeline (E2P2) software  
497 (Chae et al. 2014; Schläpfer et al. 2017). E2P2 uses BLAST and PRIAM to assign enzyme function based  
498 on sequence similarity to proteins with previously-known enzymatic functions based on functional  
499 annotations taken from several sources including MetaCyc (Caspi et al. 2020), SwissProt (UniProt  
500 Consortium 2021), and BRENDA (Chang et al. 2021). The genomes included in PMN 15 were checked  
501 using BUSCO v 3.0.2 using the Eukaryota ODB9 dataset. Enzyme prediction for PMN 15 was done using  
502 E2P2 v4.0 and RPSD v4.2, which was generated using data from PlantCyc 12.5, MetaCyc 21.5, BRENDA  
503 (downloaded April 4, 2018), SwissProt (downloaded April 4, 2018), TAIR (downloaded April 5, 2018),  
504 Gene Ontology (Downloaded April 4, 2018), and ExPasy (release of March 28, 2018).

505 Once enzymes are predicted, they must be assembled into pathways by the PathoLogic function of  
506 Pathway Tools (Karp et al. 2019). The set of predicted pathways is then further refined using the Semi-  
507 Automated Validation Infrastructure (SAVI) software (Schläpfer et al. 2017). SAVI is used to  
508 automatically apply broad curation decisions to the pathways predicted for each species. It can be used,  
509 for example, to specify particular pathways that are universal among plants and should therefore be  
510 included in all species' databases even if not predicted by PathoLogic. SAVI can also be used to specify  
511 that a particular pathway is known to be present only within a specific plant clade. Therefore, if the  
512 pathway is predicted in a species outside of that clade, it should be considered a false prediction and  
513 removed. PMN 15 was generated using Pathway Tools 24.0 and SAVI 3.1.

514 The final parts of the pipeline are grouped into three stages: refine-a, refine-b, and refine-c. In refine-a,  
515 the database changes recommended by SAVI are applied to the database and pathways added or  
516 approved by SAVI have SAVI citations added. In refine-b, pathways and enzymes with experimental  
517 evidence of presence in a plant species are added to that PGDB if they were not predicted, and  
518 appropriate experimental evidence codes are added. In refine-c, authorship information is added to the  
519 PGDB, the cellular overview is generated, and various automated data consistency checks are run.

520 The convention for PGDB versions was updated in PMN 15. Taking *SorghumbicolorCyc* 7.0.1 as an  
521 example, the first number, 7, is incremented when the PGDB is re-generated *de novo* from a new  
522 version of MetaCyc and/or a new genome assembly. The second, 0, is incremented when there are error  
523 corrections or other fixes to the content of the database. A third, 1 in the example, may be added when

524 the database is converted to a new version of Pathway Tools without being regenerated, a process that  
525 does not alter the database contents.

### 526 [Changes in curation policy](#)

527 Since its initial 1.0 release, some changes in curation policy have been made to PMN and PlantCyc. In  
528 2013, the *Arabidopsis*-specific database, AraCyc, switched from identifying proteins by locus ID to using  
529 the gene model ID. This eliminates ambiguity when multiple splice variants exist for a single locus. In  
530 PMN 10, the policy for all species was switched from using the first splice variant to the longest. This was  
531 done because a longer splice variant is likely to have more domains, making it easier to determine its  
532 function.

533 In PMN 10, the database narrowed its focus strictly to small-molecule metabolism, and pathways  
534 involved solely in macromolecule metabolism (such as protein synthesis) were removed.  
535 Macromolecules have never been the focus of PMN, and provision of information about them is a role  
536 better served by other databases with tools specifically suited to large heteropolymers like proteins and  
537 DNA/RNA.

538 In version 13 of PMN, the PlantCyc database was limited to only include pathways and enzymes with  
539 experimental evidence to support them. The original purpose of including all information, experimental  
540 and computational, in PlantCyc was to allow cross-species comparison, a function now served by the  
541 virtual data integration and display functionality recently introduced in Pathway Tools (Karp et al. 2019).  
542 PlantCyc now serves as a repository of all experimentally-supported compounds, reactions, and  
543 pathways for plants.

### 544 [Manual pathway prediction validation](#)

545 120 PMN pathways were randomly selected to manually assess pathway prediction accuracy. The 126  
546 organism-specific PGDBs were then re-generated using E2P2 and PathoLogic alone, with PathoLogic set  
547 to ignore the expected phylogenetic range of the pathway and call pathway presence / absence based  
548 only on the presence of enzymes (no taxonomic pruning), no SAVI, and skipping the step of importing  
549 pathways with experimental evidence of a species into that species database if the pathway was not  
550 predicted. This resulted in a set of PGDBs based purely on computational prediction that we refer to as  
551 “naïve prediction PGDBs”. Biocurators evaluated the accuracy of each of the 120 pathway’s prediction  
552 across all 126 organisms in PMN in the naïve prediction PGDBs and, separately, in the released version  
553 of PMN. Specifically, we evaluated whether pathway assignments to the PGDBs reflected the taxonomic  
554 range of the pathway as expected from the literature. Each pathway’s assignment to the naïve  
555 prediction PGDBs and released PGDBs was classified with respect to the expected taxonomic range as  
556 either “Expected” (predicted and expected species are mostly the same), “Broader” (pathway is  
557 predicted beyond its expected range), “Narrower” (predicted range of the pathway is smaller than the  
558 expected range), or it was identified to be a non-plant or non-algal pathway, and therefore classified as  
559 a non-PMN pathway.

### 560 [Presence-absence matrices](#)

561 In order to analyze the pathways, reactions, and compounds (PRCs) in each species’ database, presence-  
562 absence matrices were generated for each of these three data types. Each is a binary matrix containing  
563 the list of PMN organisms as its rows and a list of PRCs of one type as its columns. Each matrix element  
564 is equal to 1 if the organism contains the PRC and 0 if it does not (Supplemental Files S1-S3). Reactions  
565 were only marked as present in a species if the species had at least one enzyme annotated to the  
566 reaction, whether predicted or from experimental evidence. Since PRCs that are present in either only  
567 one organism or all organisms are not useful in differentiating plant groups, we excluded these PRCs

568 from further analysis. Separately, a table was generated that maps the species to one of several pre-  
569 defined taxonomic groups (Supplemental File S4). The groups were selected manually to best represent  
570 the diversity of species in PMN and included monophyletic and paraphyletic groups, as well as a  
571 polyphyletic “catch-all” group (“Other angiosperms”). The PRC matrices and the plant group table were  
572 used to investigate relationships among the species through the lens of metabolism. The PRC matrices  
573 were produced using a custom lisp function (Supplemental File S5).

#### 574 Multiple correspondence analysis

575 The PRC matrices were used to perform multiple correspondence analysis (MCA) (Greenacre et al.  
576 2006). This is a technique similar to principal component analysis (PCA) but is frequently used with  
577 categorical (binomial or multinomial) data. It differs from PCA in that a complete disjunctive table (CDT)  
578 is first produced from the input matrix. In a CDT, each multinomial variable  $i$  (a column in the input  
579 matrix) is split into  $J_i$  columns where  $J_i$  is the number of levels of variable  $i$ . In this analysis, the variables  
580 are the pathways, reactions, or compounds (PRCs), and there are two levels for each, present and  
581 absent. Each CDT column  $j_i$  therefore corresponds to one level of one variable and is initially set equal to  
582 1 for species for whom that PRC is present and 0 otherwise. Each group of  $J_i$  columns therefore contains,  
583 in each row, one column equal to 1 and  $J_i-1$  columns equal to 0. In this analysis, therefore, each  
584 pathway results in two columns in the CDT, set to 1 0 if the pathway is present and 0 1 if the pathway is  
585 absent. MCA then scales the values of each column in the CDT according to the rarity of that level of that  
586 variable, so that each CDT column sums to 1. The remainder of the procedure is the same as in PCA.  
587 Because of the scaling, a species will be further from the origin in the MCA scatterplot if it possesses  
588 uncommon PRCs or lacks common ones. The MCA was performed using the MCA() function of the R  
589 package FactoMineR v2.3 (Lê et al. 2008). The MCA scatter plots were colored using the columns of the  
590 plant group table (Supplemental File S4) to elucidate relationships between the MCA clusters and plant  
591 groups. The scatter plots were generated using ggplot2 v3.3.4.

#### 592 Metabolic domain enrichment

593 To examine the pathways associated with each MCA axis, the percentage of variance explained by the  
594 presence or absence of each pathway, found in `pwymca$var$contrib` (where `pwymca` is the R object  
595 returned by FactoMineR’s MCA function when run on the pathway matrix), was exported to a tab-  
596 delimited text file. To determine which metabolic domains, if any, were overrepresented in the set of  
597 pathways describing the variance of MCA dimensions 1 and 3, we ran an enrichment analysis of the set  
598 of pathways explaining the 95<sup>th</sup> percentile of the variance. Pathways were mapped to a metabolic  
599 domain using supplementary information from (Schlöpfer et al. 2017). Pathways left unmatched were  
600 manually assigned to a metabolic domain by expert curators and a new pathway-metabolic domain  
601 mapping file version 2.0 was created (Supplemental Table S7). Enrichment background was set as all  
602 pathways from PMN’s 126 organism-specific databases, all of which were assigned to metabolic  
603 domains. Enrichment was calculated using the `phyper()` function from the R stats package and p-values  
604 were corrected for multiple hypothesis testing at a false discovery rate (FDR) of 5%.

#### 605 Omics Dashboard and Enrichment Analysis

606 The sorghum drought transcriptomics data from (Varoquaux et al. 2019) were downloaded from:  
607 <https://www.stat.berkeley.edu/~epicon/publications/rnaseq/>. We specifically used their log-fold change  
608 and differential expression analysis results. For both leaf and root samples, the sets of all expressed  
609 genes were filtered to include only those differentially expressed in either cultivar as a result of post-  
610 flowering drought (using an FDR of 5%). Corresponding expression data for both gene sets were then  
611 filtered to include only the week prior to, and the first two weeks of post-flowering drought (weeks 9-  
612 11). The resulting data sets were then directly uploaded into PMN’s Omics Dashboard for visual analysis

613 of metabolic trends. Enrichment analysis of metabolic genes among leaf and root DEGs as a result of  
614 post-flowering drought was calculated in R version 3.6.3 with a hypergeometric test using the `phyper()`  
615 function from the `stats` package. The background used for this enrichment analysis was all *Sorghum*  
616 *bicolor* genes (McCormick et al. 2018) from the *Sorghum bicolor* genome annotation v3.1.1 downloaded  
617 from Phytozome v12. Violin plots were generated using the `geom_violin()` function within the `ggplot2`  
618 package in R version 3.6.3. Statistical differences between non-metabolic and metabolic DEGs as a  
619 function of time were determined by two-way ANOVA followed by Tukey's Honest Significant Difference  
620 (HSD) test ( $p < 0.05$ ) using the `lsmeans()` functions within the `lsmeans` package in R version 3.6.3.  
621 Pathway enrichment among the set of metabolic root DEGs was calculated using the "Genes Enriched  
622 for Pathways" functionality within the "Enrichments" dropdown of a SmartTable. We performed an  
623 enrichment analysis using Fisher's Exact test and Benjamini-Hochberg correction at an FDR of 5% with  
624 the set of all pathway genes from *SorghumbicolorCyc* (version 7.0.1) as the background.

## 625 Cell type activity analysis

626 We downloaded and integrated datasets from 5 existing *Arabidopsis* root single-cell RNAseq studies.  
627 Briefly, raw fastq files for 21 datasets derived from studies by (Zhang et al. 2019), (Jean-Baptiste et al.  
628 2019), (Denyer et al. 2019), (Ryu et al. 2019), and (Shulse et al. 2019) were downloaded, trimmed, and  
629 mapped using the STARsolo tool v.2.7.1a. Whitelists for each dataset were obtained either from the 10X  
630 Cellranger software tool v. 2.0 for the 10X-Chromium samples, or after following the Drop-seq  
631 computational pipeline (<https://github.com/broadinstitute/Drop-seq/releases/tag/v2.3.0>), extracting  
632 error-corrected barcodes from the final output for the Drop-seq samples. Valid cells within the digital  
633 gene expression matrices computed by STARsolo were then determined as those having total unique  
634 molecular identifier (UMI) counts greater than 10% of the 1<sup>st</sup> percentile cell, after filtering for cells with  
635 very high (20,000) UMIs. Cells containing greater than 10% mammalian reads, greater than 10%  
636 organellar (chloroplast or mitochondrial) reads, or cells having transcripts from fewer than 200 genes  
637 were filtered out. Filtered digital gene expression matrices were then pre-processed using the Seurat  
638 (v3.1.0) package after removing protoplast-inducible genes (Birnbaum et al. 2003), using the  
639 SCTransform method (with 5000 variable features). All Seurat objects were then integrated together  
640 using the approach from (Stuart et al. 2019), applying the `SelectIntegrationFeatures`,  
641 `PrepSCTIntegration`, `FindIntegrationAnchors`, and `IntegrateData` functions from the Seurat R package,  
642 using 5000 variable features, 20 principal components, and otherwise default parameters. Cell clusters  
643 were computed using the Seurat functions, `FindNeighbors` and `Find Clusters`, 20 principal components  
644 and a resolution parameter of 0.8. Index of Cell Identity (ICI) scores were computed using a combination  
645 of existing ATH1 microarray and RNAseq single cell datasets (Supplemental Table S6). Briefly, arrays  
646 were normalized using the `gcrma` R package, and RNA-seq data were trimmed using the `bbduk` tool, and  
647 mapped using `bbmap` ([sourceforge.net/projects/bbmap/](https://sourceforge.net/projects/bbmap/)). Transcript counts were quantified using the  
648 `featureCounts` tool (Liao et al. 2014). Raw RNAseq counts were then normalized using the `edgeR`  
649 package (v 3.26.0), with the "upperquartile" method. Normalized reads were then further normalized  
650 with the `gcrma`-normalized microarray data using the Feature-Specific Quantile Normalizations (FSQN)  
651 method (Franks et al. 2018) to obtain a dataset consisting of both RNA-seq and microarray-based cell-  
652 type specific transcriptome measurements. This dataset was then used to build an ICI (Birnbaum and  
653 Kussell 2011) specification matrix using the methods described by (Efroni et al. 2015). This specification  
654 table was then used to compute ICI scores for each cell in the integrated single-cell dataset, along with  
655 p-values derived from random permutation.

656 To map the single-cell data to metabolic domains, pathways, and enzymes, we used *AraCyc* v.17.0,  
657 which includes 8556 metabolic genes and 650 pathways. We used the pathway-metabolic domain  
658 mapping file version 2.0 (Supplemental Table S7) to map the pathways to 13 metabolic domains. To

659 avoid biases introduced by small sample size to the cell type specificity analysis, we only included  
660 pathways containing at least 10 genes whose transcripts were detected in the single cell data described  
661 above. Based on these criteria, 198 out of 650 pathways were included in this analysis. To compute cell  
662 type specificity at the transcript level, we first calculated the expression level for a pathway or domain  
663 per cell type by taking the average of expression values for all the genes annotated to this pathway or  
664 domain within this cell type. The cell type specificity was defined as the cell type(s) for which the  
665 expression level of a pathway or domain was at least 1.5-fold higher than their background expression,  
666 which was calculated by taking the average of expression values for all the genes annotated to this  
667 pathway or domain in all cells. Since the expression levels of a pathway or domain per cell type could be  
668 influenced by gene expression outliers, we only included the cell types in which more than 50% of genes  
669 associated with the pathway or domain showed higher expression than their background expression  
670 based on a Wilcoxon test followed by a multiple hypothesis test adjustment using FDR with a threshold  
671 of 0.01. The background expression level of a gene was calculated by taking the average of its expression  
672 values in all the cells included in this study. Heatmaps were generated using the R package ggplot2 v.3.1.  
673 To compute cell type specificity at the pathway level, we first selected the set of pathways containing at  
674 least 10 genes whose transcripts were captured by the single cell transcriptomic data to avoid biases  
675 that could be introduced by small sample size. Based on these criteria, 30% (198 out of 650) *Arabidopsis*  
676 pathways were included in this analysis.

677 In a metabolic network, isozymes are defined as enzymes encoded by different genes catalyzing the  
678 same reaction, which are usually the result of gene duplication events. To investigate whether isozymes  
679 tend to be expressed in different cells compared to enzymes catalyzing different reactions within the  
680 same pathway, we analyzed gene expression pattern similarity between a pair of enzymes across  
681 *Arabidopsis* root cells by computing Spearman's correlation. To prevent having correlations between  
682 self, we removed enzymes that are mapped to more than one reaction in a pathway as well as pathways  
683 that contain only one reaction. Spearman's correlation coefficients were computed using the function  
684 `cor()` in R. Significant correlation coefficients were determined using an R package `scrn` v.1.18.5 (Lun et  
685 al. 2016). Distribution of Spearman's rho was compared using a one-way ANOVA followed by post-hoc  
686 adjustment with Tukey's test in R. The box plot was generated using the R package ggplot2 v.3.1.

687

## 688 Acknowledgements

689 We thank members of the Rhee lab for helpful discussions. This work was supported by grants from the  
690 National Science Foundation (IOS-1546838, IOS-1026003) and the U.S. Department of Energy, Office of  
691 Science, Office of Biological and Environmental Research, Genomic Science Program grant nos. DE-  
692 SC0018277, DE-SC0008769, DE-SC0020366, and DE-SC0021286. We thank Justin Krupp and Jason  
693 Thomas for editing the manuscript. We also thank Brenda Yu for her work in constructing the 45k cell  
694 dataset. The gymnosperm illustration in Figure 1C was created with BioRender.com.

## 695 Abbreviations used

696 ANOVA = analysis of variance  
697 BUSCO = Benchmarking Single-Copy Orthologs  
698 CDT = complete disjunctive table  
699 ChEBI = Chemical Entities of Biological Interest  
700 E2P2 = Ensemble Enzyme Prediction Pipeline

701 GO = Gene Ontology  
702 JI = Jaccard Index  
703 KEGG = Kyoto Encyclopedia of Genes and Genomes  
704 MCA = multiple correspondence analysis  
705 NPP = Non-PMN pathway  
706 PCA = principal component analysis  
707 PGDB = pathway genome database  
708 PMN = Plant Metabolic Network  
709 PRC = pathway, reaction, or compound  
710 SAVI = Semi-automated Validation Infrastructure  
711

## Parsed Citations

- Altman T, Travers M, Kothari A, Caspi R, Karp PD (2013) A systematic comparison of the MetaCyc and KEGG pathway databases. BMC Bioinformatics 14: 112**  
Google Scholar: [Author Only](#) [Title Only](#) [Author and Title](#)
- Altschul SF, Gish W, Miller W, Myers EW, Lipman DJ (1990) Basic local alignment search tool. J Mol Biol 215: 403–410**  
Google Scholar: [Author Only](#) [Title Only](#) [Author and Title](#)
- Antoniadi I, Plačková L, Simonovik B, Doležal K, Turnbull C, Ljung K, Novák O (2015) Cell-type-specific cytokinin distribution within the Arabidopsis primary root apex. The Plant Cell 27: 1955–1967**  
Google Scholar: [Author Only](#) [Title Only](#) [Author and Title](#)
- Barker R, Fernandez Garcia MN, Powers SJ, Vaughan S, Bennett MJ, Phillips AL, Thomas SG, Hedden P (2020) Mapping sites of gibberellin biosynthesis in the Arabidopsis root tip. New Phytol 229: 1521–1534**  
Google Scholar: [Author Only](#) [Title Only](#) [Author and Title](#)
- Becker B, Marin B (2009) Streptophyte algae and the origin of embryophytes. Ann Bot 103: 999–1004**  
Google Scholar: [Author Only](#) [Title Only](#) [Author and Title](#)
- Beeckman T, De Smet I (2014) Pericycle. Current Biology 24: R378–R379**  
Google Scholar: [Author Only](#) [Title Only](#) [Author and Title](#)
- Birnbaum K, Shasha DE, Wang JY, Jung JW, Lambert GM, Galbraith DW, Benfey PN (2003) A gene expression map of the Arabidopsis root. Science 302: 1956–1960**  
Google Scholar: [Author Only](#) [Title Only](#) [Author and Title](#)
- Birnbaum KD, Kussell E (2011) Measuring cell identity in noisy biological systems. Nucleic Acids Res 39: 9093–9107**  
Google Scholar: [Author Only](#) [Title Only](#) [Author and Title](#)
- Carpita NC, McCann MC (2002) The functions of cell wall polysaccharides in composition and architecture revealed through mutations. Plant Soil 247: 71–80**  
Google Scholar: [Author Only](#) [Title Only](#) [Author and Title](#)
- Caspi R, Billington R, Fulcher CA, Keseler IM, Kothari A, Krummenacker M, Latendresse M, Midford PE, Ong Q, Ong WK, et al. (2018) The MetaCyc database of metabolic pathways and enzymes. Nucleic Acids Res 46: D633–D639**  
Google Scholar: [Author Only](#) [Title Only](#) [Author and Title](#)
- Caspi R, Billington R, Keseler IM, Kothari A, Krummenacker M, Midford PE, Ong WK, Paley S, Subhraveti P, Karp PD (2020) The MetaCyc database of metabolic pathways and enzymes - a 2019 update. Nucleic Acids Res 48: D445–D453**  
Google Scholar: [Author Only](#) [Title Only](#) [Author and Title](#)
- Chae L, Kim T, Nilo-Poyanco R, Rhee SY (2014) Genomic signatures of specialized metabolism in plants. Science 344: 510–513**  
Google Scholar: [Author Only](#) [Title Only](#) [Author and Title](#)
- Chang A, Jeske L, Ulbrich S, Hofmann J, Koblitz J, Schomburg I, Neumann-Schaal M, Jahn D, Schomburg D (2021) BRENDA, the ELIXIR core data resource in 2021: new developments and updates. Nucleic Acids Res 49: D498–D508**  
Google Scholar: [Author Only](#) [Title Only](#) [Author and Title](#)
- Che P, Wurtele ES, Nikolau BJ (2002) Metabolic and environmental regulation of 3-methylcrotonyl-coenzyme A carboxylase expression in Arabidopsis. Plant Physiol 129: 625–637**  
Google Scholar: [Author Only](#) [Title Only](#) [Author and Title](#)
- Chizzali C, Beerhues L (2012) Phytoalexins of the Pyrinae: Biphenyls and dibenzofurans. Beilstein J Org Chem 8: 613–620**  
Google Scholar: [Author Only](#) [Title Only](#) [Author and Title](#)
- Clark ST, Verwoerd WS (2011) A systems approach to identifying correlated gene targets for the loss of colour pigmentation in plants. BMC Bioinformatics 12: 343**  
Google Scholar: [Author Only](#) [Title Only](#) [Author and Title](#)
- Claudel-Renard C, Chevalet C, Faraut T, Kahn D (2003) Enzyme-specific profiles for genome annotation: PRIAM. Nucleic Acids Res 31: 6633–6639**  
Google Scholar: [Author Only](#) [Title Only](#) [Author and Title](#)
- Denyer T, Ma X, Klesen S, Scacchi E, Nieselt K, Timmermans MCP (2019) Spatiotemporal developmental trajectories in the Arabidopsis root revealed using high-throughput single-cell RNA sequencing. Dev Cell 48: 840–852.e5**  
Google Scholar: [Author Only](#) [Title Only](#) [Author and Title](#)
- Doebley JF, Gaut BS, Smith BD (2006) The molecular genetics of crop domestication. Cell 127: 1309–1321**  
Google Scholar: [Author Only](#) [Title Only](#) [Author and Title](#)
- Efroni I, Ip P-L, Nawy T, Mello A, Birnbaum KD (2015) Quantification of cell identity from single-cell gene expression profiles. Genome Biol 16: 9**



Google Scholar: [Author Only](#) [Title Only](#) [Author and Title](#)

**Franks JM, Cai G, Whitfield ML (2018) Feature specific quantile normalization enables cross-platform classification of molecular subtypes using gene expression data. *Bioinformatics* 34: 1868–1874**

Google Scholar: [Author Only](#) [Title Only](#) [Author and Title](#)

**Fukuda N, Ikawa Y, Aoyagi T, Kozaki A (2013) Expression of the genes coding for plastidic acetyl-CoA carboxylase subunits is regulated by a location-sensitive transcription factor binding site. *Plant Mol Biol* 82: 473–483**

Google Scholar: [Author Only](#) [Title Only](#) [Author and Title](#)

**Gao Q, Shan J, Di L, Jiang L, Xu H (2008) Therapeutic effects of daphnetin on adjuvant-induced arthritic rats. *J Ethnopharmacol* 120: 259–263**

Google Scholar: [Author Only](#) [Title Only](#) [Author and Title](#)

**Germain J, Deslongchamps P (2002) Total synthesis of (+/-)-momilactone A. *J Org Chem* 67: 5269–5278**

Google Scholar: [Author Only](#) [Title Only](#) [Author and Title](#)

**Glawischnig E (2007) Camalexin. *Phytochemistry* 68: 401–406**

Google Scholar: [Author Only](#) [Title Only](#) [Author and Title](#)

**Greenacre MJ, Blasius J, CRC Press (2006) Multiple correspondence analysis and related methods. Chapman & Hall/CRC, Boca Raton**

Google Scholar: [Author Only](#) [Title Only](#) [Author and Title](#)

**Gross BL, Olsen KM (2010) Genetic perspectives on crop domestication. *Trends Plant Sci* 15: 529–537**

Google Scholar: [Author Only](#) [Title Only](#) [Author and Title](#)

**Gupta V, Estrada AD, Blakley I, Reid R, Patel K, Meyer MD, Andersen SU, Brown AF, Lila MA, Loraine AE (2015) RNA-seq analysis and annotation of a draft blueberry genome assembly identifies candidate genes involved in fruit ripening, biosynthesis of bioactive compounds, and stage-specific alternative splicing. *Gigascience* 4: 5**

Google Scholar: [Author Only](#) [Title Only](#) [Author and Title](#)

**Halkier BA, Gershenzon J (2006) Biology and biochemistry of glucosinolates. *Annu Rev Plant Biol* 57: 303–333**

Google Scholar: [Author Only](#) [Title Only](#) [Author and Title](#)

**Hanada K, Sawada Y, Kuromori T, Klausnitzer R, Saito K, Toyoda T, Shinozaki K, Li W-H, Hirai MY (2011) Functional compensation of primary and secondary metabolites by duplicate genes in *Arabidopsis thaliana*. *Mol Biol Evol* 28: 377–382**

Google Scholar: [Author Only](#) [Title Only](#) [Author and Title](#)

**Hastings J, Owen G, Dekker A, Ennis M, Kale N, Muthukrishnan V, Turner S, Swainston N, Mendes P, Steinbeck C (2016) ChEBI in 2016: Improved services and an expanding collection of metabolites. *Nucleic Acids Res* 44: D1214–9**

Google Scholar: [Author Only](#) [Title Only](#) [Author and Title](#)

**Heazlewood JL, Howell KA, Millar AH (2003) Mitochondrial complex I from *Arabidopsis* and rice: orthologs of mammalian and fungal components coupled with plant-specific subunits. *Biochim Biophys Acta* 1604: 159–169**

Google Scholar: [Author Only](#) [Title Only](#) [Author and Title](#)

**Hochuli PA, Feist-Burkhardt S (2013) Angiosperm-like pollen and *Afropollis* from the Middle Triassic (Anisian) of the Germanic Basin (Northern Switzerland). *Front Plant Sci* 4: 344**

Google Scholar: [Author Only](#) [Title Only](#) [Author and Title](#)

**Hudson AO, Singh BK, Leustek T, Gilvarg C (2006) An LL-diaminopimelate aminotransferase defines a novel variant of the lysine biosynthesis pathway in plants. *Plant Physiol* 140: 292–301**

Google Scholar: [Author Only](#) [Title Only](#) [Author and Title](#)

**Jean-Baptiste K, McFaline-Figueroa JL, Alexandre CM, Dorrity MW, Saunders L, Bubb KL, Trapnell C, Fields S, Queitsch C, Cuperus JT (2019) Dynamics of gene expression in single root cells of *Arabidopsis thaliana*. *Plant Cell* 31: 993–1011**

Google Scholar: [Author Only](#) [Title Only](#) [Author and Title](#)

**Kanehisa M, Furumichi M, Tanabe M, Sato Y, Morishima K (2017) KEGG: New perspectives on genomes, pathways, diseases and drugs. *Nucleic Acids Res* 45: D353–D361**

Google Scholar: [Author Only](#) [Title Only](#) [Author and Title](#)

**Kanehisa M, Goto S (2000) KEGG: Kyoto encyclopedia of genes and genomes. *Nucleic Acids Res* 28: 27–30**

Google Scholar: [Author Only](#) [Title Only](#) [Author and Title](#)

**Kanehisa M, Sato Y, Furumichi M, Morishima K, Tanabe M (2019) New approach for understanding genome variations in KEGG. *Nucleic Acids Res* 47: D590–D595**

Google Scholar: [Author Only](#) [Title Only](#) [Author and Title](#)

**Kang S-H, Pandey RP, Lee C-M, Sim J-S, Jeong J-T, Choi B-S, Jung M, Ginzburg D, Zhao K, Won SY, et al. (2020) Genome-enabled discovery of anthraquinone biosynthesis in *Senna tora*. *Nat Commun* 11: 5875**

Google Scholar: [Author Only](#) [Title Only](#) [Author and Title](#)

**Karp PD, Latendresse M, Caspi R (2011) The pathway tools pathway prediction algorithm. *Stand Genomic Sci* 5: 424–429**

Google Scholar: [Author Only](#) [Title Only](#) [Author and Title](#)

**Karp PD, Latendresse M, Paley SM, Krummenacker M, Ong QD, Billington R, Kothari A, Weaver D, Lee T, Subhraveti P, et al. (2016) Pathway Tools version 19.0 update: software for pathway/genome informatics and systems biology. *Brief Bioinform* 17: 877–890**

Google Scholar: [Author Only](#) [Title Only](#) [Author and Title](#)

**Karp PD, Midford PE, Billington R, Kothari A, Krummenacker M, Latendresse M, Ong WK, Subhraveti P, Caspi R, Fulcher C, et al. (2019) Pathway Tools version 23.0 update: software for pathway/genome informatics and systems biology. *Brief Bioinform* 22: 109–126**

Google Scholar: [Author Only](#) [Title Only](#) [Author and Title](#)

**Katsuzaki H, Kawakishi S, Osawa T (1994) Sesaminol glucosides in sesame seeds. *Phytochemistry* 35: 773–776**

Google Scholar: [Author Only](#) [Title Only](#) [Author and Title](#)

**Kim S, Chen J, Cheng T, Gindulyte A, He J, He S, Li Q, Shoemaker BA, Thiessen PA, Yu B, et al (2021) PubChem in 2021: new data content and improved web interfaces. *Nucleic Acids Res* 49: D1388–D1395**

Google Scholar: [Author Only](#) [Title Only](#) [Author and Title](#)

**Kokubun T, Harborne JB (1995) Phytoalexin induction in the sapwood of plants of the Maloideae (Rosaceae): Biphenyls or dibenzofurans. *Phytochemistry* 40: 1649–1654**

Google Scholar: [Author Only](#) [Title Only](#) [Author and Title](#)

**Kooke R, Morgado L, Becker F, van Eekelen H, Hazarika R, Zheng Q, de Vos RCH, Johannes F, Keurentjes JJB (2019) Epigenetic mapping of the *Arabidopsis* metabolome reveals mediators of the epigenotype-phenotype map. *Genome Res* 29: 96–106**

Google Scholar: [Author Only](#) [Title Only](#) [Author and Title](#)

**Lalonde S, Ehrhardt DW, Loqué D, Chen J, Rhee SY, Frommer WB (2008) Molecular and cellular approaches for the detection of protein–protein interactions: latest techniques and current limitations. *Plant J* 53: 610–635**

Google Scholar: [Author Only](#) [Title Only](#) [Author and Title](#)

**Latendresse M (2018) PythonCyc. Available at: <https://github.com/latendre/PythonCyc>.**

Google Scholar: [Author Only](#) [Title Only](#) [Author and Title](#)

**Lê S, Josse J, Husson F (2008) FactoMineR: An R package for multivariate analysis. *J Stat Softw* 25: 1–18**

Google Scholar: [Author Only](#) [Title Only](#) [Author and Title](#)

**Lee SY, Son DJ, Lee YK, Lee JW, Lee HJ, Yun YW, Ha TY, Hong JT (2006) Inhibitory effect of sesaminol glucosides on lipopolysaccharide-induced NF- $\kappa$ B activation and target gene expression in cultured rat astrocytes. *Neurosci Res* 56: 204–212**

Google Scholar: [Author Only](#) [Title Only](#) [Author and Title](#)

**Liao Y, Smyth GK, Shi W (2014) featureCounts: An efficient general purpose program for assigning sequence reads to genomic features. *Bioinformatics* 30: 923–930**

Google Scholar: [Author Only](#) [Title Only](#) [Author and Title](#)

**Linka M, Weber APM (2005) Shuffling ammonia between mitochondria and plastids during photorespiration. *Trends Plant Sci* 10: 461–465**

Google Scholar: [Author Only](#) [Title Only](#) [Author and Title](#)

**Loescher WH (1987) Physiology and metabolism of sugar alcohols in higher plants. *Physiol Plant* 70: 553–557**

Google Scholar: [Author Only](#) [Title Only](#) [Author and Title](#)

**Lun ATL, McCarthy DJ, Marioni JC (2016) A step-by-step workflow for low-level analysis of single-cell RNA-seq data with Bioconductor. *F1000Research* 5: 2122**

Google Scholar: [Author Only](#) [Title Only](#) [Author and Title](#)

**Mao L, Kawaide H, Higuchi T, Chen M, Miyamoto K, Hirata Y, Kimura H, Miyazaki S, Teruya M, Fujiwara K, et al. (2020) Genomic evidence for convergent evolution of gene clusters for monilactone biosynthesis in land plants. *Proc Natl Acad Sci USA* 117: 12472–12480**

Google Scholar: [Author Only](#) [Title Only](#) [Author and Title](#)

**McCormick RF, Truong SK, Sreedasyam A, Jenkins J, Shu S, Sims D, Kennedy M, Amirebrahimi M, Weers BD, McKinley B, et al. (2018) The sorghum bicolor reference genome: improved assembly, gene annotations, a transcriptome atlas, and signatures of genome organization. *Plant J* 93: 338–354**

Google Scholar: [Author Only](#) [Title Only](#) [Author and Title](#)

**Moore BM, Wang P, Fan P, Leong B, Schenck CA, Lloyd JP, Lehti-Shiu MD, Last RL, Pichersky E, Shiu S-H (2019) Robust predictions of specialized metabolism genes through machine learning. *Proc Natl Acad Sci USA* 116: 2344–2353**

Google Scholar: [Author Only](#) [Title Only](#) [Author and Title](#)

**Moussaieff A, Rogachev I, Brodsky L, Malitsky S, Toal TW, Belcher H, Yativ M, Brady SM, Benfey PN, Aharoni A (2013) High-resolution metabolic mapping of cell types in plant roots. *Proc Natl Acad Sci USA* 110: E1232–41**

Google Scholar: [Author Only](#) [Title Only](#) [Author and Title](#)

**Naithani S, Preece J, D'Eustachio P, Gupta P, Amarasinghe V, Dharmawardhana PD, Wu G, Fabregat A, Elser JL, Weiser J, et al. (2017) Plant Reactome: A resource for plant pathways and comparative analysis. *Nucleic Acids Res* 45: D1029–D1039**

Google Scholar: [Author Only](#) [Title Only](#) [Author and Title](#)

**Naithani S, Gupta P, Preece J, D'Eustachio P, Elser JL, Garg P, Dikeman DA, Kiff J, Cook J, Olson A, et al. (2020) Plant Reactome: A knowledgebase and resource for comparative pathway analysis. *Nucleic Acids Res* 48: D1093–D1103**

Google Scholar: [Author Only](#) [Title Only](#) [Author and Title](#)

**Najafabadi AS, Naghavi MR, Farahmand H, Abbasi A (2017) Transcriptome and metabolome analysis of *Ferula gummosa* Boiss. to reveal major biosynthetic pathways of galbanum compounds. *Funct Integr Genomics* 17: 725–737**

Google Scholar: [Author Only](#) [Title Only](#) [Author and Title](#)

**Nakamura Y, Afendi FM, Parvin AK, Ono N, Tanaka K, Hirai Morita A, Sato T, Sugiura T, Altaf-Ul-Amin M, Kanaya S (2014) KNApSACK metabolite activity database for retrieving the relationships between metabolites and biological activities. *Plant Cell Physiol* 55: e7**

Google Scholar: [Author Only](#) [Title Only](#) [Author and Title](#)

**NDong C, Anzellotti D, Ibrahim RK, Huner NPA, Sarhan F (2003) Daphnetin methylation by a novel O-methyltransferase is associated with cold acclimation and photosystem II excitation pressure in rye. *J Biol Chem* 278: 6854–6861**

Google Scholar: [Author Only](#) [Title Only](#) [Author and Title](#)

**Obata T (2019) Metabolons in plant primary and secondary metabolism. *Phytochem Rev* 18: 1483–1507**

Google Scholar: [Author Only](#) [Title Only](#) [Author and Title](#)

**Obayashi T, Aoki Y, Tadaka S, Kagaya Y, Kinoshita K (2018) ATTED-II in 2018: A plant coexpression database based on investigation of the statistical property of the mutual rank index. *Plant Cell Physiol* 59: e3–e3**

Google Scholar: [Author Only](#) [Title Only](#) [Author and Title](#)

**Paley S, Parker K, Spaulding A, Tomb J-F, O'Maille P, Karp PD (2017) The Omics Dashboard for interactive exploration of gene-expression data. *Nucleic Acids Res* 45: 12113–12124**

Google Scholar: [Author Only](#) [Title Only](#) [Author and Title](#)

**Paley S, Billington R, Herson J, Krummenacker M, Karp PD (2021) Pathway Tools Visualization of Organism-Scale Metabolic Networks. *Metabolites* 11: 64**

Google Scholar: [Author Only](#) [Title Only](#) [Author and Title](#)

**Panchy N, Lehti-Shiu M, Shiu S-H (2016) Evolution of gene duplication in plants. *Plant Physiol* 171: 2294–2316**

Google Scholar: [Author Only](#) [Title Only](#) [Author and Title](#)

**Pant B-D, Pant P, Erban A, Huhman D, Kopka J, Scheible W-R (2015) Identification of primary and secondary metabolites with phosphorus status-dependent abundance in *Arabidopsis*, and of the transcription factor PHR1 as a major regulator of metabolic changes during phosphorus limitation. *Plant Cell Environ* 38: 172–187**

Google Scholar: [Author Only](#) [Title Only](#) [Author and Title](#)

**Potter SC, Luciani A, Eddy SR, Park Y, Lopez R, Finn RD (2018) HMMER web server: 2018 update. *Nucleic Acids Res* 46: W200–W204**

Google Scholar: [Author Only](#) [Title Only](#) [Author and Title](#)

**Ranz A, Yang Y-Z, Lin X-B, Zhang Z-N, Meshnick SR, Pan H-Z (1992) Daphnetin: A novel antimalarial agent with in vitro and in vivo activity. *Am J Trop Med Hyg* 46: 15–20**

Google Scholar: [Author Only](#) [Title Only](#) [Author and Title](#)

**Rhee SY, Mutwil M (2014) Towards revealing the functions of all genes in plants. *Trends Plant Sci* 19: 212–221**

Google Scholar: [Author Only](#) [Title Only](#) [Author and Title](#)

**Ryu KH, Huang L, Kang HM, Schiefelbein J (2019) Single-cell RNA sequencing resolves molecular relationships among individual plant cells. *Plant Physiol* 179: 1444–1456**

Google Scholar: [Author Only](#) [Title Only](#) [Author and Title](#)

**Sakurai N, Ara T, Ogata Y, Sano R, Ohno T, Sugiyama K, Hiruta A, Yamazaki K, Yano K, Aoki K, et al. (2011) KaPPA-View4: A metabolic pathway database for representation and analysis of correlation networks of gene co-expression and metabolite co-accumulation and omics data. *Nucleic Acids Research* 39: D677–D684**

Google Scholar: [Author Only](#) [Title Only](#) [Author and Title](#)

**Saptari RT, Susila H (2018) Data mining study of hormone biosynthesis gene expression reveals new aspects of somatic embryogenesis regulation. *In Vitro Cell Dev Biol Plant* 55: 139–152**

Google Scholar: [Author Only](#) [Title Only](#) [Author and Title](#)

**Schlöpfer P, Zhang P, Wang C, Kim T, Banf M, Chae L, Dreher K, Chavali AK, Nilo-Poyanco R, Bernard T, et al. (2017) Genome-wide prediction of metabolic enzymes, pathways, and gene clusters in plants. *Plant Physiol* 173: 2041–2059**

Google Scholar: [Author Only](#) [Title Only](#) [Author and Title](#)

**Schuetz M, Smith R, Ellis B (2013) Xylem tissue specification, patterning, and differentiation mechanisms. *J Exp Bot* 64: 11–31**

Google Scholar: [Author Only](#) [Title Only](#) [Author and Title](#)

**Shulse CN, Cole BJ, Ciobanu D, Lin J, Yoshinaga Y, Gouran M, Turco GM, Zhu Y, O'Malley RC, Brady SM, et al. (2019) High-throughput single-cell transcriptome profiling of plant cell types. *Cell Rep* 27: 2241–2247.e4**

Google Scholar: [Author Only](#) [Title Only](#) [Author and Title](#)

**Simão FA, Waterhouse RM, Ioannidis P, Kriventseva EV, Zdobnov EM (2015) BUSCO: Assessing genome assembly and annotation completeness with single-copy orthologs. *Bioinformatics* 31: 3210–3212**

Google Scholar: [Author Only](#) [Title Only](#) [Author and Title](#)

**Slenter DN, Kutmon M, Hanspers K, Riutta A, Windsor J, Nunes N, Mélius J, Cirillo E, Coort SL, Digles D, et al. (2018) WikiPathways: A multifaceted pathway database bridging metabolomics to other omics research. *Nucleic Acids Res* 46: D661–D667**

Google Scholar: [Author Only](#) [Title Only](#) [Author and Title](#)

**Song MJ, Potter BI, Doyle JJ, Coate JE (2020) Gene balance predicts transcriptional responses immediately following ploidy change in *Arabidopsis thaliana*. *Plant Cell* 32: 1434–1448**

Google Scholar: [Author Only](#) [Title Only](#) [Author and Title](#)

**Stuart T, Butler A, Hoffman P, Hafemeister C, Papalexi E, Mauck WM 3rd, Hao Y, Stoeckius M, Smibert P, Satija R (2019) Comprehensive integration of single-cell data. *Cell* 177: 1888–1902.e21**

Google Scholar: [Author Only](#) [Title Only](#) [Author and Title](#)

**Tenenhaus M, Young FW (1985) An analysis and synthesis of multiple correspondence analysis, optimal scaling, dual scaling, homogeneity analysis and other methods for quantifying categorical multivariate data. *Psychometrika* 50: 91–119**

Google Scholar: [Author Only](#) [Title Only](#) [Author and Title](#)

**Uhrig RG, Echevarría-Zomeño S, Schlapfer P, Grossmann J, Roschitzki B, Koerber N, Fiorani F, Grussem W (2020) Diurnal dynamics of the *Arabidopsis* rosette proteome and phosphoproteome. *Plant Cell Environ* 44: 821–841**

Google Scholar: [Author Only](#) [Title Only](#) [Author and Title](#)

**Ulbricht C, Basch E, Hammerness P, Vora M, Wylie J, Woods J (2004) An evidence-based systematic review of belladonna by the natural standard research collaboration. *J Herb Pharmacother* 4: 61–90**

Google Scholar: [Author Only](#) [Title Only](#) [Author and Title](#)

**UniProt Consortium (2021) UniProt: the universal protein knowledgebase in 2021. *Nucleic Acids Res* 49: D480–D489**

Google Scholar: [Author Only](#) [Title Only](#) [Author and Title](#)

**Varoquaux N, Cole B, Gao C, Pierroz G, Baker CR, Patel D, Madera M, Jeffers T, Hollingsworth J, Sievert J, et al. (2019) Transcriptomic analysis of field-droughted sorghum from seedling to maturity reveals biotic and metabolic responses. *Proc Natl Acad Sci USA* 116: 27124–27132**

Google Scholar: [Author Only](#) [Title Only](#) [Author and Title](#)

**Vogel J (2008) Unique aspects of the grass cell wall. *Curr Opin Plant Biol* 11: 301–307**

Google Scholar: [Author Only](#) [Title Only](#) [Author and Title](#)

**Wang W, Galili G (2016) Transgenic high-lysine rice – a realistic solution to malnutrition?. *J Exp Bot* 67: 4009–4011**

Google Scholar: [Author Only](#) [Title Only](#) [Author and Title](#)

**Waterhouse RM, Seppey M, Simão FA, Manni M, Ioannidis P, Klioutchnikov G, Kriventseva EV, Zdobnov EM (2018) BUSCO applications from quality assessments to gene prediction and phylogenomics. *Mol Biol Evol* 35: 543–548**

Google Scholar: [Author Only](#) [Title Only](#) [Author and Title](#)

**Wendrich JR, Yang B, Vandamme N, Verstaen K, Smet W, Van de Velde C, Minne M, Wybouw B, Mor E, Arents HE, et al. (2020) Vascular transcription factors guide plant epidermal responses to limiting phosphate conditions. *Science* 370**

Google Scholar: [Author Only](#) [Title Only](#) [Author and Title](#)

**Weng J-K (2014) The evolutionary paths towards complexity: A metabolic perspective. *New Phytol* 201: 1141–1149**

Google Scholar: [Author Only](#) [Title Only](#) [Author and Title](#)

**Wink M (2013) Evolution of secondary metabolites in legumes (Fabaceae). *S Afr J Bot* 89: 164–175**

Google Scholar: [Author Only](#) [Title Only](#) [Author and Title](#)

**Wurtzel ET, Kutchan TM (2016) Plant metabolism, the diverse chemistry set of the future. *Science* 353: 1232–1236**

Google Scholar: [Author Only](#) [Title Only](#) [Author and Title](#)

**Zhang T-Q, Xu Z-G, Shang G-D, Wang J-W (2019) A single-cell RNA sequencing profiles the developmental landscape of *Arabidopsis* root. *Mol Plant* 12: 648–660**

Google Scholar: [Author Only](#) [Title Only](#) [Author and Title](#)
